# Supplementary material for: Molecular Characterization of Secreted Factors and Extracellular Vesicles-Embedded miRNAs from Bone Marrow-Derived Mesenchymal Stromal Cells in Presence of Synovial Fluid from Osteoarthritis Patients
Source: MDPI journal article supplement (doi:10.3390/biology11111632), 2022-11-08
Supplement: s1 [file s1]

Supplementary Table S3 – GO terms defined by SF-treated BMSCs secreted factors

|                                                                                                                                                                                                                                                                                                                                                                   |                                                                     |            |                 |                |
|-------------------------------------------------------------------------------------------------------------------------------------------------------------------------------------------------------------------------------------------------------------------------------------------------------------------------------------------------------------------|---------------------------------------------------------------------|------------|-----------------|----------------|
| - GO:0040011                                                                                                                                                                                                                                                                                                                                                      | Locomotion                                                          | (found) 65 | (database) 1251 | (FDR) 3.26e-41 |
| NGFR,MIF,CCL17,TGFB1,HGF,CCL2,CCL1,CCL13,KITLG,BMP4,CCL21,CCL27,IL1B,EPCAM,KDR,ICAM1,FGF7,EGFR,FLT1,CXCL13,KIT,CXCL16,VCAM1,CXCL5,PPBP,PF4,SHH,FIGF,AXL,IGFBP6,CCL11,IL16,IL12A,CXCL10,ALCAM,CXCL8,CXCL11,ANG,PLAUR,PDGFA,CCL20,CXCL9,XCL1,IL6R,ENG,CCL7,CCL25,CCL8,CCL26,CXCL12,BMP7,IL6,NTF3,CCL24,GDNF,BDNF,ANGPT1,PGF,CCL5,CCL16,VEGFA,CCL14,CCL18,VEGFC,CCL4 |                                                                     |            |                 |                |
| - GO:0006935                                                                                                                                                                                                                                                                                                                                                      | Chemotaxis                                                          | 54         | 545             | 1.95e-46       |
| NGFR,MIF,CCL17,HGF,CCL2,CCL1,CCL13,BMP4,CCL21,CCL27,IL1B,FGF7,FLT1,CXCL13,KIT,CXCL16,CXCL5,PPBP,PF4,SHH,FIGF,CCL11,IL16,CXCL10,ALCAM,CXCL8,CXCL11,PLAUR,PDGFA,CCL20,CXCL9,XCL1,IL6R,ENG,CCL7,CCL25,CCL8,CCL26,CXCL12,BMP7,IL6,NTF3,CCL24,GDNF,BDNF,ANGPT1,PGF,CCL5,CCL16,VEGFA,CCL14,CCL18,VEGFC,CCL4                                                             |                                                                     |            |                 |                |
| - GO:0071621                                                                                                                                                                                                                                                                                                                                                      | Granulocyte chemotaxis                                              | 28         | 81              | 6.81e-36       |
| CCL17,CCL2,CCL1,CCL13,CCL21,IL1B,CXCL13,CXCL5,PPBP,PF4,CCL11,CXCL10,CXCL8,CXCL11,CCL20,CXCL9,XCL1,CCL7,CCL25,CCL8,CCL26,CCL24,CCL5,CCL16,VEGFA,CCL14,CCL18,CCL4                                                                                                                                                                                                   |                                                                     |            |                 |                |
| - GO:0048247                                                                                                                                                                                                                                                                                                                                                      | Lymphocyte chemotaxis                                               | 23         | 50              | 1.40e-31       |
| CCL17,CCL2,CCL1,CCL13,CCL21,CXCL13,CXCL16,CCL11,CXCL10,CXCL11,CCL20,XCL1,CCL7,CCL25,CCL8,CCL26,CXCL12,CCL24,CCL5,CCL16,CCL14,CCL18,CCL4                                                                                                                                                                                                                           |                                                                     |            |                 |                |
| - GO:0002548                                                                                                                                                                                                                                                                                                                                                      | Monocyte chemotaxis                                                 | 21         | 43              | 3.61e-29       |
| CCL17,CCL2,CCL1,CCL13,CCL21,FLT1,CCL11,CCL20,XCL1,IL6R,CCL7,CCL25,CCL8,CCL26,IL6,CCL24,CCL5,CCL16,CCL14,CCL18,CCL4                                                                                                                                                                                                                                                |                                                                     |            |                 |                |
| - GO:0071363                                                                                                                                                                                                                                                                                                                                                      | Cellular response to growth factor stimulus                         | 30         | 494             | 7.74e-19       |
| FGF4,NGFR,TGFB1,HGF,CCL2,TGFB3,BMP4,GDF15,FST,FLT4,KDR,FGF7,EGFR,FLT1,CXCL13,FIGF,CXCL8,XCL1,NGF,BMP5,ENG,TNFRSF1B,BMP7,NTF3,BDNF,PGF,NTF4,CCL5,VEGFA,VEGFC                                                                                                                                                                                                       |                                                                     |            |                 |                |
| - GO:0070102                                                                                                                                                                                                                                                                                                                                                      | interleukin-6-mediated signaling pathway                            | 3          | 16              | 0.0029         |
| IL6R,IL6ST,IL6                                                                                                                                                                                                                                                                                                                                                    |                                                                     |            |                 |                |
| - GO:0043567                                                                                                                                                                                                                                                                                                                                                      | Regulation of insulin-like growth factor receptor signaling pathway | 8          | 23              | 5.50e-10       |
| IGFBP2,IGFBP4,IGFBP1,IGFBP6,IGF1,GH1,BMP5,IGFBP3                                                                                                                                                                                                                                                                                                                  |                                                                     |            |                 |                |
| - GO:0030198                                                                                                                                                                                                                                                                                                                                                      | Extracellular matrix organization                                   | 13         | 338             | 7.90e-06       |
| TIMP1,TGFB1,SERPINE1,CDH1,TIMP2,KDR,ICAM1,VCAM1,TNFRSF11B,PDGFA,CTSS,ENG,SPP1                                                                                                                                                                                                                                                                                     |                                                                     |            |                 |                |
