# Supplementary material for: Molecular Characterization of Secreted Factors and Extracellular Vesicles-Embedded miRNAs from Bone Marrow-Derived Mesenchymal Stromal Cells in Presence of Synovial Fluid from Osteoarthritis Patients
Source: MDPI journal article supplement (doi:10.3390/biology11111632), 2022-11-08
Supplement: s1 [file s1]

Supplementary Table S1 – Pooled SF factors

| TYPE | FACTOR   | (pg/ml) |                                                      |
|------|----------|---------|------------------------------------------------------|
| GF   | IGFBP4   | 248,050 | Insulin-like growth factor-binding protein 4         |
| REC  | VCAM1    | 109,797 | Vascular cell adhesion protein 1                     |
| CYT  | ICAM2    | 109,414 | Intercellular adhesion molecule 2                    |
| GF   | IGFBP2   | 44,358  | Insulin-like growth factor-binding protein 2         |
| CYT  | PLG      | 42,376  | Plasminogen                                          |
| GF   | IGFBP3   | 42,150  | Insulin-like growth factor-binding protein 3         |
| CYT  | SIGLEC5  | 32,371  | Sialic acid-binding Ig-like lectin 5                 |
| GF   | TGFB1    | 29,154  | Transforming growth factor beta-1                    |
| INF  | TIMP2    | 25,220  | Metalloproteinase inhibitor 2                        |
| REC  | SELL     | 20,525  | L-selectin                                           |
| INF  | IL6R     | 19,933  | Interleukin-6 receptor subunit alpha                 |
| GF   | BMP4     | 19,550  | Bone morphogenetic protein 4                         |
| INF  | TNFRSF1A | 19,497  | Tumor necrosis factor receptor superfamily member 1A |
| GF   | CSF1R    | 19,117  | Macrophage colony-stimulating factor 1 receptor      |
| CYT  | IL6ST    | 15,002  | Interleukin-6 receptor subunit beta                  |
| CHE  | IFNL1    | 13,977  | Interferon lambda-1                                  |
| REC  | TNFRSF17 | 12,355  | Tumor necrosis factor receptor superfamily member 17 |
| REC  | PLAUR    | 11,597  | Urokinase plasminogen activator surface receptor     |
| INF  | TNFRSF1B | 10,977  | Tumor necrosis factor receptor superfamily member 1B |
| INF  | TIMP1    | 9,879   | Metalloproteinase inhibitor 1                        |
| CYT  | CTSS     | 9,582   | Cathepsin S                                          |
| INF  | ICAM1    | 9,291   | Intercellular adhesion molecule 1                    |
| CYT  | PARN     | 9,230   | Poly(A)-specific ribonuclease PARN                   |
| CYT  | SERPINE1 | 7,097   | Plasminogen activator inhibitor 1                    |
| GF   | IGFBP6   | 6,732   | Insulin-like growth factor-binding protein 6         |
| INF  | CCL5     | 6,700   | C-C motif chemokine 5                                |
| REC  | CD14     | 5,872   | Monocyte differentiation antigen CD14                |
| GF   | IGFBP1   | 5,671   | Insulin-like growth factor-binding protein 1         |
| REC  | PI3      | 5,319   | Elafin                                               |
| GF   | VEGFA    | 4,862   | Vascular endothelial growth factor A                 |
| REC  | ALCAM    | 4,815   | CD166 antigen                                        |
| GF   | KDR      | 4,809   | Vascular endothelial growth factor receptor 2        |
| INF  | PDGFB    | 4,537   | Platelet-derived growth factor subunit B             |
| CYT  | FLT1     | 4,535   | Vascular endothelial growth factor receptor 1        |
| CYT  | INHBA    | 4,386   | Inhibin beta A chain                                 |
| GF   | FGF4     | 4,059   | Fibroblast growth factor 4                           |
| GF   | FGF7     | 3,499   | Fibroblast growth factor 7                           |
| GF   | KIT      | 3,386   | Mast/stem cell growth factor receptor Kit            |
| REC  | PDGFRB   | 3,182   | Platelet-derived growth factor receptor beta         |
| REC  | LCN2     | 3,153   | Neutrophil gelatinase-associated lipocalin           |
| CHE  | MIF      | 3,061   | Macrophage migration inhibitory factor               |
| CYT  | ANG      | 2,814   | Angiogenin                                           |
| INF  | IL11     | 2,617   | Interleukin-11                                       |
| CHE  | PF4      | 2,361   | Platelet factor 4                                    |
| GF   | NTF3     | 2,350   | Neurotrophin-3                                       |

|     |           |       |                                                           |
|-----|-----------|-------|-----------------------------------------------------------|
| CHE | XCL1      | 2,350 | Lymphotactin                                              |
| GF  | BMP7      | 2,249 | Bone morphogenetic protein 7                              |
| CYT | FCGR2B    | 2,221 | Low affinity immunoglobulin gamma Fc region receptor II-b |
| REC | TNFRSF14  | 2,201 | Tumor necrosis factor receptor superfamily member 14      |
| CHE | CXCL16    | 2,179 | C-X-C motif chemokine 16                                  |
| GF  | FGF2      | 1,931 | Fibroblast growth factor 2                                |
| REC | TNFRSF21  | 1,902 | Tumor necrosis factor receptor superfamily member 21      |
| REC | PECAM1    | 1,877 | Platelet endothelial cell adhesion molecule               |
| CHE | CCL27     | 1,820 | C-C motif chemokine 27                                    |
| CYT | IL13RA2   | 1,736 | Interleukin-13 receptor subunit alpha-2                   |
| CHE | MST1      | 1,651 | Hepatocyte growth factor-like protein                     |
| CYT | IL13RA1   | 1,625 | Interleukin-13 receptor subunit alpha-1                   |
| REC | LYVE1     | 1,494 | Lymphatic vessel endothelial hyaluronic acid receptor 1   |
| GF  | EGFR      | 1,484 | Epidermal growth factor receptor                          |
| REC | SELE      | 1,367 | E-selectin                                                |
| CYT | RETN      | 1,353 | Resistin                                                  |
| REC | IL21R     | 1,248 | Interleukin-21 receptor                                   |
| GF  | INS       | 1,234 | Insulin                                                   |
| CYT | TREM1     | 1,186 | Triggering receptor expressed on myeloid cells 1          |
| INF | CCL2      | 1,100 | C-C motif chemokine 2                                     |
| CYT | CDH1      | 1,075 | Cadherin-1                                                |
| CHE | CXCL11    | 1,068 | C-X-C motif chemokine 11                                  |
| CYT | IL23A     | 1,060 | Interleukin-23 subunit alpha                              |
| REC | TNFRSF10C | 993   | Tumor necrosis factor receptor superfamily member 10C     |
| GF  | BMP5      | 969   | Bone morphogenetic protein 5                              |
| GF  | HGF       | 962   | Hepatocyte growth factor                                  |
| GF  | AREG      | 909   | Amphiregulin                                              |
| CYT | IL2RB     | 904   | Interleukin-2 receptor subunit beta                       |
| CYT | CED       | 876   | Diaphyseal Dysplasia 1                                    |
| REC | ERBB3     | 812   | Receptor tyrosine-protein kinase erbB-3                   |
| GF  | NGFR      | 811   | Tumor necrosis factor receptor superfamily member 16      |
| REC | CNTN2     | 811   | Contactin-2                                               |
| REC | CEACAM1   | 809   | Carcinoembryonic antigen-related cell adhesion molecule 1 |
| REC | MOK       | 792   | MAPK/MAK/MRK overlapping kinase                           |
| REC | ENG       | 777   | Endoglin                                                  |
| CHE | CCL26     | 761   | C-C motif chemokine 26                                    |
| REC | FAS       | 753   | Tumor necrosis factor receptor superfamily member 6       |
| CHE | LIF       | 710   | Leukemia inhibitory factor                                |
| CHE | CCL21     | 691   | C-C motif chemokine 21                                    |
| GF  | GDF15     | 669   | Growth/differentiation factor 15                          |
| GF  | TGFB3     | 632   | Transforming growth factor beta-3                         |
| GF  | KITLG     | 606   | Kit ligand                                                |
| CYT | LGALS7    | 601   | Galectin-7                                                |
| GF  | IGF1      | 600   | Insulin-like growth factor I                              |
| CYT | TEK       | 588   | Angiopoietin-1 receptor                                   |
| REC | CD80      | 588   | T-lymphocyte activation antigen CD80                      |
| INF | CCL15     | 558   | C-C motif chemokine 15                                    |

|     |           |     |                                                       |
|-----|-----------|-----|-------------------------------------------------------|
| CHE | SPP1      | 549 | Osteopontin                                           |
| GF  | NTF4      | 525 | Neurotrophin-4                                        |
| REC | SCARB2    | 516 | Lysosome membrane protein 2                           |
| GF  | GDNF      | 471 | Glial cell line-derived neurotrophic factor           |
| INF | IL1RN     | 459 | Interleukin-1 receptor antagonist protein             |
| GF  | TGFA      | 444 | Protransforming growth factor alpha                   |
| REC | NRG1      | 425 | Pro-neuregulin-1, membrane-bound isoform              |
| INF | CXCL9     | 410 | C-X-C motif chemokine 9                               |
| REC | IL17RA    | 408 | Interleukin-17 receptor A                             |
| REC | TNFRSF18  | 404 | Tumor necrosis factor receptor superfamily member 18  |
| GF  | PGF       | 391 | Placenta growth factor                                |
| INF | CSF2      | 386 | Granulocyte-macrophage colony-stimulating factor      |
| GF  | PDGFA     | 384 | Platelet-derived growth factor subunit A              |
| REC | MICA      | 349 | MHC class I polypeptide-related sequence A            |
| INF | IL16      | 339 | Pro-interleukin-16                                    |
| CHE | CCL28     | 336 | C-C motif chemokine 28                                |
| REC | TYRO3     | 323 | Tyrosine-protein kinase receptor TYRO3                |
| CYT | DKK1      | 319 | Dickkopf-related protein 1                            |
| CYT | PDGF1     | 318 | Platelet-Derived Growth Factor A Chain                |
| CYT | TNFRSF10D | 313 | Tumor necrosis factor receptor superfamily member 10D |
| CYT | NRCAM     | 310 | Neuronal cell adhesion molecule                       |
| GF  | FIGF      | 309 | Vascular endothelial growth factor D                  |
| CYT | TGFB2     | 308 | Transforming growth factor beta-2                     |
| CHE | TNFSF14   | 298 | Tumor necrosis factor ligand superfamily member 14    |
| CHE | IFNL2     | 274 | Interferon lambda-2                                   |
| REC | TNFRSF9   | 263 | Tumor necrosis factor receptor superfamily member 9   |
| CHE | IL18BP    | 242 | Interleukin-18-binding protein                        |
| REC | TNFRSF8   | 228 | Tumor necrosis factor receptor superfamily member 8   |
| CHE | CXCL10    | 227 | C-X-C motif chemokine 10                              |
| REC | FLT3LG    | 225 | Fms-related tyrosine kinase 3 ligand                  |
| REC | CD40LG    | 225 | CD40 ligand                                           |
| INF | IL6       | 209 | Interleukin-6                                         |
| CHE | IL31      | 201 | Interleukin-31                                        |
| CYT | ANGPT1    | 200 | Angiopoietin-1                                        |
| CHE | CCL25     | 190 | C-C motif chemokine 25                                |
| CHE | CXCL12    | 184 | C-X-C motif chemokine 12                              |
| CYT | IL1RL1    | 182 | Interleukin-1 receptor-like 1                         |
| GF  | FLT4      | 179 | Vascular endothelial growth factor receptor 3         |
| CYT | IL17B     | 178 | Interleukin-17B                                       |
| INF | CCL24     | 171 | C-C motif chemokine 24                                |
| CYT | SDF1      | 165 | Stromal cell-derived factor 1                         |
| INF | CCL3      | 163 | C-C motif chemokine 3                                 |
| GF  | PROK1     | 150 | Prokineticin-1                                        |
| CYT | VEGFC     | 134 | Vascular endothelial growth factor C                  |
| REC | MICB      | 134 | MHC class I polypeptide-related sequence B            |
| CHE | AXL       | 131 | Tyrosine-protein kinase receptor UFO                  |
| INF | IL2       | 122 | Interleukin-2                                         |

|     |           |     |                                                       |
|-----|-----------|-----|-------------------------------------------------------|
| REC | HAVCR1    | 120 | Hepatitis A virus cellular receptor 1                 |
| CYT | CD40      | 114 | Tumor necrosis factor receptor superfamily member 5   |
| INF | IL1A      | 112 | Interleukin-1 alpha                                   |
| CYT | TDGF1     | 108 | Teratocarcinoma-derived growth factor 1               |
| GF  | TNFRSF11B | 104 | Tumor necrosis factor receptor superfamily member 11B |
| INF | IL7       | 104 | Interleukin-7                                         |
| CYT | FST       | 103 | Follistatin                                           |
| CHE | CCL7      | 101 | C-C motif chemokine 7                                 |
| GF  | NGF       | 99  | Beta-nerve growth factor                              |
| INF | IL1B      | 99  | Interleukin-1 beta                                    |
| GF  | GH1       | 94  | Somatotropin                                          |
| INF | IL12B     | 92  | Interleukin-12 subunit beta                           |
| CYT | THPO      | 91  | Thrombopoietin                                        |
| INF | IFNG      | 86  | Interferon gamma                                      |
| INF | CCL11     | 85  | Eotaxin                                               |
| REC | IL10RB    | 74  | Interleukin-10 receptor subunit beta                  |
| REC | EDA2R     | 70  | Tumor necrosis factor receptor superfamily member 27  |
| CYT | IL2RA     | 69  | Interleukin-2 receptor subunit alpha                  |
| CHE | BTC       | 63  | Probetacellulin                                       |
| REC | ICAM3     | 60  | Intercellular adhesion molecule 3                     |
| GF  | HBEGF     | 57  | Proheparin-binding EGF-like growth factor             |
| INF | CCL4      | 57  | C-C motif chemokine 4                                 |
| INF | CXCL8     | 56  | Interleukin-8                                         |
| INF | CCL1      | 47  | C-C motif chemokine 1                                 |
| INF | LTA       | 46  | Lymphotoxin-alpha                                     |
| CHE | CCL8      | 41  | C-C motif chemokine 8                                 |
| CYT | EPCAM     | 38  | Epithelial cell adhesion molecule                     |
| CYT | AGRP      | 33  | Agouti-related protein                                |
| INF | IL4       | 32  | Interleukin-4                                         |
| GF  | BDNF      | 31  | Brain-derived neurotrophic factor                     |
| INF | IL10      | 30  | Interleukin-10                                        |
| INF | CXCL13    | 27  | C-X-C motif chemokine 13                              |
| INF | IL15      | 24  | Interleukin-15                                        |
| CHE | CCL20     | 17  | C-C motif chemokine 20                                |
| INF | IL5       | 16  | Interleukin-5                                         |
| INF | IL17A     | 11  | Interleukin-17A                                       |
| INF | IL13      | 9   | Interleukin-13                                        |
| REC | IL1R1     | 9   | Interleukin-1 receptor type 1                         |
| CHE | IL17F     | 9   | Interleukin-17F                                       |
| CHE | CCL13     | 7   | C-C motif chemokine 13                                |
| INF | CSF3      | 7   | Granulocyte colony-stimulating factor                 |
| CHE | PPBP      | 5   | Platelet basic protein                                |
| CYT | SHH       | 5   | Sonic hedgehog protein                                |
| CHE | CCL23     | 4   | Myeloid progenitor inhibitory factor                  |
| CHE | CCL16     | 4   | C-C motif chemokine 16                                |
| CHE | CCL17     | 4   | C-C motif chemokine 17                                |
| GF  | EGF       | 3   | Pro-epidermal growth factor                           |

|     |       |   |                                                   |
|-----|-------|---|---------------------------------------------------|
| INF | CSF1  | 3 | Macrophage colony-stimulating factor 1            |
| INF | IL12A | 2 | Interleukin-12 subunit alpha                      |
| CYT | FASLG | 1 | Tumor necrosis factor ligand superfamily member 6 |
| CHE | CCL22 | 1 | C-C motif chemokine 22                            |

---

CHE: Chemokine; CYT: Cytokine; GF: Growth factor; INF: Inflammation; REC: Receptor
