# Supplementary material for: Molecular Characterization of Secreted Factors and Extracellular Vesicles-Embedded miRNAs from Bone Marrow-Derived Mesenchymal Stromal Cells in Presence of Synovial Fluid from Osteoarthritis Patients
Source: MDPI journal article supplement (doi:10.3390/biology11111632), 2022-11-08
Supplement: s1 [file s1]

Supplementary Table S4 – miRNAs detected in SF-treated BMSC-EVs

| miRBase ID      | C <sub>RT</sub> |       |       |       |      | Weight % |
|-----------------|-----------------|-------|-------|-------|------|----------|
|                 | B1              | B2    | B3    | Mean  | SD   |          |
| hsa-miR-518f-3p | 9.26            | 12.46 | 13.80 | 11.84 | 1.90 | 17.75728 |
| hsa-miR-24-3p   | 12.47           | 12.14 | 12.20 | 12.27 | 0.15 | 13.16838 |
| hsa-miR-193b-3p | 13.04           | 12.78 | 12.95 | 12.92 | 0.11 | 8.388070 |
| hsa-miR-222-3p  | 13.26           | 13.12 | 12.81 | 13.06 | 0.19 | 7.591257 |
| hsa-miR-1274B   | 13.12           | 13.18 | 13.33 | 13.21 | 0.09 | 6.863791 |
| hsa-miR-574-3p  | 13.50           | 13.24 | 13.55 | 13.43 | 0.14 | 5.882132 |
| hsa-miR-191-5p  | 13.43           | 13.53 | 13.56 | 13.51 | 0.06 | 5.582864 |
| hsa-miR-484     | 14.17           | 13.74 | 13.90 | 13.94 | 0.18 | 4.142033 |
| hsa-miR-320a-3p | 14.34           | 13.94 | 14.30 | 14.19 | 0.18 | 3.468564 |
| hsa-miR-197-3p  | 15.20           | 14.51 | 14.89 | 14.86 | 0.28 | 2.181023 |
| hsa-miR-19b-3p  | 15.44           | 15.55 | 15.68 | 15.55 | 0.10 | 1.352228 |
| hsa-miR-214-3p  | 15.47           | 15.49 | 15.81 | 15.59 | 0.16 | 1.317989 |
| hsa-miR-99a-5p  | 15.69           | 15.67 | 15.63 | 15.66 | 0.03 | 1.254117 |
| hsa-miR-145-5p  | 15.61           | 15.59 | 15.80 | 15.67 | 0.09 | 1.250356 |
| hsa-miR-125b-5p | 15.76           | 15.67 | 15.65 | 15.69 | 0.05 | 1.226040 |
| hsa-miR-1274A   | 15.80           | 15.93 | 16.14 | 15.96 | 0.14 | 1.021016 |
| hsa-miR-627-5p  | 17.05           | 14.73 | 16.22 | 16.00 | 0.96 | 0.992408 |
| hsa-miR-342-3p  | 16.22           | 15.80 | 16.38 | 16.13 | 0.25 | 0.904174 |
| hsa-miR-409-3p  | 16.19           | 16.33 | 15.94 | 16.15 | 0.16 | 0.891932 |
| hsa-miR-21-5p   | 15.80           | 16.24 | 16.46 | 16.17 | 0.28 | 0.884135 |
| hsa-miR-106a-5p | 16.02           | 16.42 | 16.33 | 16.25 | 0.17 | 0.832009 |
| hsa-miR-16-5p   | 16.37           | 16.29 | 16.19 | 16.28 | 0.07 | 0.816961 |
| hsa-miR-17-5p   | 16.10           | 16.36 | 16.39 | 16.28 | 0.13 | 0.815264 |
| hsa-let-7b-5p   | 16.39           | 16.40 | 16.66 | 16.48 | 0.12 | 0.710056 |
| hsa-miR-29a-3p  | 16.71           | 16.83 | 16.39 | 16.64 | 0.19 | 0.635518 |
| hsa-miR-30c-5p  | 16.48           | 16.81 | 16.81 | 16.70 | 0.16 | 0.610052 |
| hsa-miR-221-3p  | 16.79           | 16.75 | 16.86 | 16.80 | 0.05 | 0.569594 |
| hsa-miR-92a-3p  | 17.12           | 16.93 | 17.10 | 17.05 | 0.08 | 0.478969 |
| hsa-miR-30b-5p  | 16.93           | 17.20 | 17.35 | 17.16 | 0.17 | 0.444629 |
| hsa-miR-20a-5p  | 16.92           | 17.28 | 17.43 | 17.21 | 0.21 | 0.428492 |
| hsa-miR-132-3p  | 17.31           | 17.13 | 17.47 | 17.30 | 0.14 | 0.402206 |
| hsa-miR-618     | 13.41           | 14.78 | 24.32 | 17.50 | 4.85 | 0.350464 |
| hsa-miR-138-5p  | 17.39           | 17.43 | 17.87 | 17.56 | 0.22 | 0.335722 |
| hsa-miR-382-5p  | 18.55           | 17.53 | 17.41 | 17.83 | 0.51 | 0.279323 |
| hsa-miR-663b    | 17.74           | 17.68 | 18.19 | 17.87 | 0.23 | 0.271308 |
| hsa-miR-483-5   | 18.29           | 17.46 | 17.99 | 17.91 | 0.34 | 0.264011 |
| hsa-miR-199a-3p | 18.14           | 18.30 | 17.86 | 18.10 | 0.18 | 0.231327 |
| hsa-miR-520e-3p | 15.88           | 17.10 | 21.67 | 18.22 | 2.49 | 0.213307 |
| hsa-miR-31-5p   | 18.39           | 18.44 | 17.85 | 18.23 | 0.27 | 0.211883 |
| hsa-miR-28-3p   | 18.39           | 18.51 | 18.18 | 18.36 | 0.14 | 0.193402 |
| hsa-miR-146a-5p | 18.47           | 18.77 | 18.02 | 18.42 | 0.31 | 0.185395 |
| hsa-miR-720     | 18.69           | 18.31 | 18.31 | 18.44 | 0.18 | 0.183435 |
| hsa-miR-193a-5p | 18.27           | 18.37 | 18.71 | 18.45 | 0.19 | 0.181957 |
| hsa-miR-34a-5p  | 19.15           | 18.58 | 17.84 | 18.52 | 0.54 | 0.172740 |
| hsa-miR-376a-3p | 18.51           | 18.59 | 18.58 | 18.56 | 0.03 | 0.168094 |
| hsa-miR-186-5p  | 19.01           | 18.74 | 18.40 | 18.72 | 0.25 | 0.151005 |
| hsa-miR-376c-3p | 18.90           | 18.83 | 18.43 | 18.72 | 0.20 | 0.150901 |
| hsa-miR-152-3p  | 18.80           | 18.77 | 19.01 | 18.86 | 0.11 | 0.136692 |
| hsa-let-7e-5p   | 19.64           | 18.69 | 18.59 | 18.97 | 0.47 | 0.126219 |
| hsa-miR-29c-3p  | 18.76           | 20.74 | 17.75 | 19.08 | 1.24 | 0.117359 |
| hsa-miR-662     | 17.67           | 21.31 | 18.27 | 19.08 | 1.59 | 0.117251 |
| hsa-miR-146b-5p | 19.33           | 19.20 | 18.85 | 19.13 | 0.20 | 0.113650 |

|                 |       |       |       |       |      |          |
|-----------------|-------|-------|-------|-------|------|----------|
| hsa-miR-99b-5p  | 19.33 | 19.33 | 18.89 | 19.18 | 0.21 | 0.109273 |
| hsa-miR-30a-3p  | 19.08 | 19.65 | 19.35 | 19.36 | 0.24 | 0.096478 |
| hsa-miR-149-5p  | 19.45 | 19.56 | 19.39 | 19.47 | 0.07 | 0.089685 |
| hsa-miR-636     | 18.85 | 17.30 | 22.31 | 19.48 | 2.09 | 0.088696 |
| hsa-miR-205-5p  | 19.84 | 21.49 | 17.22 | 19.52 | 1.76 | 0.08675  |
| hsa-miR-302a-3p | 16.12 | 22.29 | 20.22 | 19.54 | 2.57 | 0.085102 |
| hsa-miR-425-5p  | 18.90 | 19.82 | 19.93 | 19.55 | 0.46 | 0.084788 |
| hsa-miR-143-3p  | 19.68 | 19.60 | 19.64 | 19.64 | 0.03 | 0.079752 |
| hsa-miR-331-3p  | 19.87 | 19.78 | 19.34 | 19.67 | 0.23 | 0.078129 |
| hsa-miR-328-3p  | 19.47 | 19.88 | 19.84 | 19.73 | 0.18 | 0.074825 |
| hsa-miR-224-5p  | 19.74 | 19.80 | 19.69 | 19.74 | 0.04 | 0.074154 |
| hsa-miR-130a-3p | 19.89 | 19.60 | 19.81 | 19.76 | 0.12 | 0.072998 |
| hsa-miR-218-5p  | 20.11 | 19.73 | 19.82 | 19.89 | 0.17 | 0.067126 |
| hsa-miR-886-5p  | 19.99 | 19.98 | 19.85 | 19.94 | 0.07 | 0.064749 |
| hsa-miR-155-5p  | 20.03 | 20.37 | 19.71 | 20.04 | 0.27 | 0.060427 |
| hsa-miR-1290    | 20.05 | 20.67 | 19.52 | 20.08 | 0.47 | 0.058775 |
| hsa-miR-106b-5p | 20.00 | 19.83 | 20.61 | 20.15 | 0.34 | 0.055991 |
| hsa-let-7a-5p   | 19.75 | 20.81 | 19.90 | 20.15 | 0.47 | 0.055746 |
| hsa-miR-30e-3p  | 19.45 | 20.29 | 20.77 | 20.17 | 0.54 | 0.055182 |
| hsa-miR-365a-3p | 19.87 | 20.40 | 20.25 | 20.17 | 0.22 | 0.055004 |
| hsa-miR-212-3p  | 20.18 | 20.18 | 20.42 | 20.26 | 0.11 | 0.051713 |
| hsa-miR-335-5p  | 19.98 | 20.18 | 20.74 | 20.30 | 0.32 | 0.050299 |
| hsa-miR-26a-5p  | 20.53 | 20.49 | 19.94 | 20.32 | 0.27 | 0.049733 |
| hsa-miR-1304-5p | 23.65 | 20.63 | 16.75 | 20.34 | 2.83 | 0.048867 |
| hsa-miR-339-5p  | 20.46 | 19.78 | 20.84 | 20.36 | 0.44 | 0.048306 |
| hsa-miR-532-5p  | 20.66 | 20.50 | 20.14 | 20.44 | 0.22 | 0.045859 |
| hsa-miR-125a-5p | 20.56 | 20.59 | 20.19 | 20.45 | 0.18 | 0.045426 |
| hsa-miR-590-5p  | 20.97 | 20.34 | 20.49 | 20.60 | 0.27 | 0.040959 |
| hsa-miR-31-3p   | 20.75 | 20.90 | 20.42 | 20.69 | 0.20 | 0.038393 |
| hsa-miR-10b-3p  | 20.84 | 20.81 | 20.68 | 20.78 | 0.07 | 0.036214 |
| hsa-miR-345-5p  | 20.78 | 20.83 | 20.79 | 20.80 | 0.02 | 0.035649 |
| hsa-miR-210-3p  | 20.37 | 21.22 | 20.98 | 20.86 | 0.36 | 0.034197 |
| hsa-miR-127-3p  | 20.92 | 21.03 | 20.64 | 20.86 | 0.16 | 0.034118 |
| hsa-miR-134-5p  | 20.87 | 20.80 | 21.01 | 20.89 | 0.09 | 0.033354 |
| hsa-miR-130b-3p | 20.70 | 20.97 | 21.22 | 20.97 | 0.21 | 0.031774 |
| hsa-miR-19a-3p  | 20.99 | 21.04 | 21.06 | 21.03 | 0.03 | 0.030417 |
| hsa-miR-660-5p  | 21.33 | 20.84 | 21.36 | 21.18 | 0.24 | 0.027457 |
| hsa-miR-301a-3p | 20.94 | 20.91 | 22.00 | 21.28 | 0.51 | 0.025483 |
| hsa-let-7g-5p   | 21.25 | 21.22 | 21.41 | 21.30 | 0.08 | 0.025260 |
| hsa-miR-370-3p  | 21.45 | 20.89 | 21.77 | 21.37 | 0.36 | 0.024025 |
| hsa-miR-27b-3p  | 21.41 | 21.31 | 21.43 | 21.38 | 0.05 | 0.023754 |
| hsa-miR-93-5p   | 21.19 | 21.42 | 21.55 | 21.39 | 0.15 | 0.023667 |
| hsa-miR-7-1-3p  | 21.31 | 21.64 | 21.36 | 21.44 | 0.15 | 0.022919 |
| hsa-miR-140-5p  | 21.42 | 21.58 | 21.33 | 21.44 | 0.10 | 0.022839 |
| hsa-miR-625-3p  | 20.92 | 21.83 | 21.59 | 21.45 | 0.39 | 0.022713 |
| hsa-miR-551b-3p | 26.46 | 17.16 | 20.79 | 21.47 | 3.83 | 0.022338 |
| hsa-miR-27a-3p  | 21.29 | 21.49 | 21.79 | 21.52 | 0.21 | 0.021622 |
| hsa-miR-374a-5p | 21.43 | 22.11 | 21.18 | 21.57 | 0.39 | 0.020823 |
| hsa-miR-494-3p  | 21.69 | 21.59 | 21.59 | 21.62 | 0.05 | 0.020123 |
| hsa-miR-339-3p  | 21.44 | 21.31 | 22.20 | 21.65 | 0.39 | 0.019755 |
| hsa-miR-423-5p  | 21.85 | 21.21 | 22.01 | 21.69 | 0.34 | 0.019223 |
| hsa-miR-30a-5p  | 21.79 | 21.64 | 21.89 | 21.77 | 0.10 | 0.018161 |
| hsa-miR-23a-3p  | 21.40 | 21.64 | 22.31 | 21.78 | 0.38 | 0.018065 |
| hsa-miR-195-5p  | 21.93 | 21.87 | 21.78 | 21.86 | 0.06 | 0.017106 |
| hsa-miR-15b-5p  | 22.06 | 21.86 | 21.68 | 21.87 | 0.15 | 0.017008 |
| hsa-miR-323a-3p | 21.98 | 21.92 | 21.92 | 21.94 | 0.03 | 0.016206 |

|                 |       |       |       |       |      |          |
|-----------------|-------|-------|-------|-------|------|----------|
| hsa-miR-193b-5p | 21.90 | 21.85 | 22.25 | 22.00 | 0.18 | 0.015528 |
| hsa-miR-25-3p   | 21.46 | 21.91 | 22.71 | 22.03 | 0.51 | 0.015229 |
| hsa-miR-99b-3p  | 21.56 | 22.13 | 22.39 | 22.03 | 0.34 | 0.015205 |
| hsa-miR-410-3p  | 21.70 | 22.58 | 21.85 | 22.05 | 0.38 | 0.015020 |
| hsa-miR-432-3p  | 21.86 | 22.52 | 21.91 | 22.10 | 0.30 | 0.014478 |
| hsa-miR-34b-3p  | 21.89 | 22.59 | 22.22 | 22.23 | 0.28 | 0.013191 |
| hsa-miR-532-3p  | 22.42 | 22.39 | 21.88 | 22.23 | 0.25 | 0.013191 |
| hsa-miR-26b-5p  | 22.45 | 22.55 | 21.74 | 22.25 | 0.36 | 0.013069 |
| hsa-let-7c-5p   | 22.38 | 22.57 | 21.92 | 22.29 | 0.27 | 0.012694 |
| hsa-miR-181a-5p | 22.39 | 22.33 | 22.21 | 22.31 | 0.07 | 0.012528 |
| hsa-miR-34a-3p  | 22.27 | 22.39 | 22.90 | 22.52 | 0.27 | 0.010789 |
| hsa-miR-10a-5p  | 22.65 | 22.60 | 22.44 | 22.57 | 0.09 | 0.010467 |
| hsa-miR-28-5p   | 23.38 | 22.55 | 21.82 | 22.58 | 0.64 | 0.010349 |
| hsa-miR-664a-3p | 22.94 | 22.77 | 22.26 | 22.66 | 0.29 | 0.009811 |
| hsa-miR-361-5p  | 22.42 | 22.40 | 23.49 | 22.77 | 0.51 | 0.009118 |
| hsa-miR-708-5p  | 23.53 | 22.95 | 22.04 | 22.84 | 0.61 | 0.008651 |
| hsa-miR-215-5p  | 22.83 | 22.84 | 22.89 | 22.85 | 0.03 | 0.008579 |
| hsa-miR-374b-5p | 23.41 | 22.79 | 22.37 | 22.86 | 0.43 | 0.008557 |
| hsa-miR-296-5p  | 23.10 | 22.39 | 23.20 | 22.89 | 0.36 | 0.008342 |
| hsa-miR-766-3p  | 23.74 | 22.58 | 22.38 | 22.90 | 0.60 | 0.008323 |
| hsa-miR-93-3p   | 22.46 | 23.26 | 23.18 | 22.97 | 0.36 | 0.007916 |
| hsa-miR-454-3p  | 23.17 | 23.15 | 22.62 | 22.98 | 0.26 | 0.007851 |
| hsa-miR-324-3p  | 22.64 | 23.01 | 23.33 | 22.99 | 0.28 | 0.007805 |
| hsa-miR-192-5p  | 22.61 | 23.48 | 22.94 | 23.01 | 0.36 | 0.007696 |
| hsa-miR-1260a   | 22.53 | 22.28 | 24.25 | 23.02 | 0.87 | 0.007659 |
| hsa-miR-539-5p  | 23.62 | 22.92 | 22.88 | 23.14 | 0.34 | 0.007031 |
| hsa-miR-148a-3p | 23.45 | 23.66 | 22.91 | 23.34 | 0.32 | 0.006125 |
| hsa-miR-330-3p  | 23.97 | 23.56 | 22.74 | 23.42 | 0.51 | 0.005786 |
| hsa-miR-886-3p  | 22.73 | 24.79 | 22.82 | 23.45 | 0.95 | 0.005682 |
| hsa-miR-629-3p  | 22.88 | 24.47 | 23.04 | 23.46 | 0.72 | 0.005630 |
| hsa-miR-411-5p  | 23.83 | 24.50 | 22.74 | 23.69 | 0.72 | 0.004798 |
| hsa-miR-194-5p  | 25.62 | 17.47 | 27.99 | 23.70 | 4.50 | 0.004789 |
| hsa-miR-744-5p  | 24.53 | 23.34 | 23.46 | 23.78 | 0.53 | 0.004524 |
| hsa-miR-487b-3p | 23.45 | 23.71 | 24.22 | 23.79 | 0.32 | 0.004477 |
| hsa-miR-223-3p  | 22.73 | 24.40 | 24.29 | 23.81 | 0.76 | 0.004436 |
| hsa-miR-103a-3p | 23.80 | 24.82 | 23.17 | 23.93 | 0.68 | 0.004079 |
| hsa-miR-491-5p  | 24.39 | 23.98 | 23.48 | 23.95 | 0.37 | 0.004012 |
| hsa-miR-485-3p  | 23.60 | 24.40 | 23.90 | 23.96 | 0.33 | 0.003973 |
| hsa-miR-185-5p  | 24.40 | 23.74 | 23.88 | 24.01 | 0.29 | 0.003858 |
| hsa-miR-1271-5p | 23.31 | 25.22 | 23.63 | 24.05 | 0.84 | 0.003741 |
| hsa-miR-493-3p  | 24.39 | 23.64 | 24.14 | 24.05 | 0.31 | 0.003734 |
| hsa-miR-30d-3p  | 24.92 | 23.55 | 23.79 | 24.09 | 0.60 | 0.003651 |
| hsa-miR-433-3p  | 23.70 | 24.36 | 24.25 | 24.10 | 0.29 | 0.003611 |
| hsa-miR-455-5p  | 24.91 | 24.16 | 23.31 | 24.13 | 0.66 | 0.003552 |
| hsa-miR-452-5p  | 23.76 | 25.21 | 23.79 | 24.25 | 0.68 | 0.003251 |
| hsa-miR-615-3p  | 24.10 | 24.52 | 24.24 | 24.29 | 0.17 | 0.003172 |
| hsa-miR-942-5p  | 23.83 | 25.50 | 23.76 | 24.36 | 0.80 | 0.003016 |
| hsa-miR-133a-3p | 24.72 | 24.89 | 23.81 | 24.47 | 0.48 | 0.002791 |
| hsa-miR-140-3p  | 25.33 | 24.25 | 24.13 | 24.57 | 0.54 | 0.002611 |
| hsa-miR-20b-5p  | 25.09 | 24.24 | 24.57 | 24.63 | 0.35 | 0.002500 |
| hsa-miR-425-3p  | 25.14 | 25.39 | 24.43 | 24.99 | 0.41 | 0.001956 |
| hsa-miR-214-5p  | 25.54 | 25.44 | 24.22 | 25.07 | 0.60 | 0.001850 |
| hsa-miR-615-5p  | 24.45 | 24.88 | 25.92 | 25.08 | 0.62 | 0.001831 |
| hsa-miR-203a-3p | 25.20 | 24.37 | 26.14 | 25.24 | 0.72 | 0.001645 |
| hsa-miR-1226-5p | 24.54 | 25.43 | 25.77 | 25.25 | 0.52 | 0.001634 |
| hsa-miR-10b-5p  | 26.01 | 26.04 | 23.95 | 25.33 | 0.98 | 0.001537 |

|                  |       |       |       |       |      |          |
|------------------|-------|-------|-------|-------|------|----------|
| hsa-miR-889-3p   | 25.44 | 26.20 | 24.83 | 25.49 | 0.56 | 0.001380 |
| hsa-miR-335-3p   | 25.87 | 25.20 | 25.51 | 25.53 | 0.27 | 0.001344 |
| hsa-miR-628-3p   | 25.37 | 25.93 | 25.48 | 25.59 | 0.24 | 0.001287 |
| hsa-miR-483-3p   | 27.78 | 24.95 | 24.50 | 25.74 | 1.45 | 0.001158 |
| hsa-miR-589-3p   | 26.40 | 25.77 | 25.52 | 25.90 | 0.37 | 0.001042 |
| hsa-miR-874-3p   | 25.06 | 25.90 | 26.75 | 25.90 | 0.69 | 0.001038 |
| hsa-miR-222-5p   | 26.33 | 25.74 | 25.64 | 25.90 | 0.31 | 0.001036 |
| hsa-miR-424-3p   | 27.39 | 24.73 | 26.10 | 26.07 | 1.08 | 0.000920 |
| hsa-miR-1285-3p  | 26.08 | 26.35 | 26.27 | 26.23 | 0.11 | 0.000825 |
| hsa-miR-136-3p   | 26.52 | 27.19 | 25.19 | 26.30 | 0.83 | 0.000788 |
| hsa-miR-148b-3p  | 26.74 | 25.86 | 26.77 | 26.46 | 0.42 | 0.000707 |
| hsa-miR-24-2-5p  | 27.84 | 25.87 | 25.71 | 26.47 | 0.97 | 0.000698 |
| hsa-miR-126-3p   | 26.02 | 26.59 | 27.08 | 26.56 | 0.43 | 0.000656 |
| hsa-miR-650      | 26.73 | 27.08 | 25.93 | 26.58 | 0.48 | 0.000649 |
| hsa-miR-25-5p    | 26.44 | 27.78 | 26.52 | 26.91 | 0.61 | 0.000514 |
| hsa-miR-372-3p   | 29.20 | 25.38 | 26.45 | 27.01 | 1.61 | 0.000481 |
| hsa-miR-193a-3p  | 26.90 | 27.47 | 26.82 | 27.06 | 0.29 | 0.000464 |
| hsa-miR-130b-5p  | 26.03 | 26.88 | 28.57 | 27.16 | 1.05 | 0.000434 |
| hsa-miR-18a-5p   | 27.13 | 28.12 | 26.93 | 27.39 | 0.52 | 0.000369 |
| hsa-miR-502-3p   | 28.56 | 26.38 | 29.24 | 28.06 | 1.22 | 0.000233 |
| hsa-miR-151a-5p  | 28.00 | 28.56 | 28.17 | 28.25 | 0.23 | 0.000204 |
| hsa-miR-1300     | 27.65 | 28.84 | 28.26 | 28.25 | 0.48 | 0.000204 |
| hsa-miR-1255b-5p | 29.02 | 28.91 | 27.68 | 28.54 | 0.61 | 0.000167 |
| hsa-miR-505-5p   | 29.15 | 27.32 | 29.53 | 28.67 | 0.97 | 0.000153 |
| hsa-miR-125a-3p  | 28.22 | 31.54 | 29.12 | 29.63 | 1.40 | 7.85E-05 |
| hsa-miR-26a-1-3p | 30.89 | 29.99 | 29.98 | 30.29 | 0.43 | 4.96E-05 |
| hsa-miR-191-3p   | 30.12 | 33.22 | 32.38 | 31.91 | 1.31 | 1.62E-05 |
| hsa-miR-145-3p   | 32.66 | 34.60 | 30.66 | 32.64 | 1.61 | 9.73E-06 |

In **bold** miRNAs falling in the first quartile of abundance.
