# Supplementary material for: Molecular Characterization of Secreted Factors and Extracellular Vesicles-Embedded miRNAs from Bone Marrow-Derived Mesenchymal Stromal Cells in Presence of Synovial Fluid from Osteoarthritis Patients
Source: MDPI journal article supplement (doi:10.3390/biology11111632), 2022-11-08
Supplement: s1 [file s1]

Supplementary Table S2 – SF-treated BMSCs secreted factors

| TYPE | FACTOR   | pg/milione cellule |         |         |         |        | FUNCTION                                             |
|------|----------|--------------------|---------|---------|---------|--------|------------------------------------------------------|
|      |          | B1                 | B2      | B3      | MEAN    | SD     |                                                      |
| GF   | IGFBP4   | 109,869            | 131,569 | 124,587 | 122,009 | 9,045  | Insulin-like growth factor-binding protein 4         |
| GF   | IGFBP3   | 84,091             | 117,198 | 102,025 | 101,105 | 13,532 | Insulin-like growth factor-binding protein 3         |
| GF   | TGFB1    | 39,339             | 32,615  | 30,189  | 34,048  | 3,870  | Transforming growth factor beta-1                    |
| INF  | TIMP2    | 22,096             | 28,331  | 30,462  | 26,963  | 3,550  | Metalloproteinase inhibitor 2                        |
| CHE  | IFNL1    | 19,399             | 20,613  | 22,381  | 20,798  | 1,225  | Interferon lambda-1                                  |
| CHE  | IL9      | 1,770              | 24,217  | 16,270  | 14,086  | 9,293  | Interleukin-9                                        |
| INF  | TIMP1    | 12,116             | 14,563  | 14,503  | 13,727  | 1,140  | Metalloproteinase inhibitor 1                        |
| GF   | BMP4     | 7,872              | 10,892  | 20,075  | 12,946  | 5,190  | Bone morphogenetic protein 4                         |
| CYT  | SERPINE1 | 10,110             | 14,584  | 13,253  | 12,649  | 1,876  | Plasminogen activator inhibitor 1                    |
| GF   | IGFBP2   | 6,439              | 14,130  | 10,661  | 10,410  | 3,145  | Insulin-like growth factor-binding protein 2         |
| GF   | VEGFA    | 7,794              | 12,442  | 10,732  | 10,323  | 1,919  | Vascular endothelial growth factor A                 |
| CHE  | PF4      | 9,652              | 10,111  | 8,745   | 9,503   | 567    | Platelet factor 4                                    |
| GF   | IGFBP6   | 6,466              | 10,314  | 9,509   | 8,763   | 1,657  | Insulin-like growth factor-binding protein 6         |
| CHE  | MIF      | 3,604              | 4,526   | 4,973   | 4,368   | 570    | Macrophage migration inhibitory factor               |
| REC  | VCAM1    | 4,131              | 5,719   | 2,852   | 4,234   | 1,173  | Vascular cell adhesion protein 1                     |
| CYT  | INHBA    | 4,344              | 4,350   | 3,770   | 4,155   | 272    | Inhibin beta A chain                                 |
| CHE  | XCL1     | 2,921              | 4,047   | 5,177   | 4,048   | 921    | Lymphotoctin                                         |
| CHE  | CCL27    | 4,283              | 2,370   | 3,979   | 3,544   | 840    | C-C motif chemokine 27                               |
| CHE  | CXCL16   | 2,374              | 3,787   | 3,932   | 3,364   | 702    | C-X-C motif chemokine 16                             |
| INF  | TNFRSF1A | 2,640              | 3,403   | 3,410   | 3,151   | 361    | Tumor necrosis factor receptor superfamily member 1A |
| CHE  | MST1     | 3,356              | 1,822   | 2,150   | 2,443   | 659    | Hepatocyte growth factor-like protein                |
| CHE  | CCL26    | 2,212              | 932     | 4,108   | 2,417   | 1,305  | C-C motif chemokine 26                               |
| CHE  | CCL21    | 2,552              | 3,078   | 1,594   | 2,408   | 614    | C-C motif chemokine 21                               |
| CHE  | CXCL11   | 2,165              | 3,168   | 1,466   | 2,266   | 698    | C-X-C motif chemokine 11                             |
| REC  | PLAUR    | 1,515              | 2,482   | 1,641   | 1,879   | 429    | Urokinase plasminogen activator surface receptor     |
| CYT  | ANGPT1   | 1,553              | 2,005   | 1,837   | 1,798   | 187    | Angiopoietin-1                                       |
| GF   | BMP7     | 2,239              | 327     | 1,766   | 1,444   | 813    | Bone morphogenetic protein 7                         |
| CYT  | IL6ST    | 1,239              | 1,842   | 1,090   | 1,390   | 325    | Interleukin-6 receptor subunit beta                  |
| GF   | HGF      | 1,058              | 1,462   | 1,443   | 1,321   | 186    | Hepatocyte growth factor                             |
| GF   | FGF4     | 1,536              | 1,484   | 729     | 1,250   | 369    | Fibroblast growth factor 4                           |
| CYT  | ANG      | 971                | 1,427   | 1,301   | 1,233   | 193    | Angiogenin                                           |
| REC  | ALCAM    | 956                | 1,209   | 1,239   | 1,135   | 127    | CD166 antigen                                        |
| CYT  | FST      | 690                | 1,260   | 1,284   | 1,078   | 274    | Follistatin                                          |
| CYT  | CTSS     | 808                | 1,256   | 1,150   | 1,071   | 191    | Cathepsin S                                          |
| GF   | KDR      | 1,078              | 887     | 1,102   | 1,022   | 96     | Vascular endothelial growth factor receptor 2        |
| CHE  | TNFSF14  | 1,027              | 1,012   | 846     | 962     | 82     | Tumor necrosis factor ligand superfamily member 14   |
| CHE  | SPP1     | 906                | 1,019   | 861     | 929     | 67     | Osteopontin                                          |
| CHE  | CCL25    | 573                | 995     | 1,075   | 881     | 220    | C-C motif chemokine 25                               |
| CYT  | FLT1     | 1,038              | 816     | 725     | 860     | 131    | Vascular endothelial growth factor receptor 1        |
| INF  | CCL2     | 662                | 814     | 1,053   | 843     | 161    | C-C motif chemokine 2                                |
| CYT  | CDH1     | 599                | 1,073   | 680     | 784     | 207    | Cadherin-1                                           |
| GF   | FGF7     | 726                | 1,138   | 482     | 782     | 271    | Fibroblast growth factor 7                           |
| GF   | IGFBP1   | 457                | 922     | 873     | 750     | 209    | Insulin-like growth factor-binding protein 1         |
| CHE  | LIF      | 665                | 1,170   | 337     | 724     | 343    | Leukemia inhibitory factor                           |

|     |           |       |       |     |     |     |                                                       |
|-----|-----------|-------|-------|-----|-----|-----|-------------------------------------------------------|
| CYT | CED       | 544   | 794   | 699 | 679 | 103 | Diaphyseal Dysplasia 1                                |
| CYT | IL13RA2   | 171   | 1,001 | 846 | 673 | 361 | Interleukin-13 receptor subunit alpha-2               |
| INF | LTA       | 1,346 | 248   | 202 | 599 | 529 | Lymphotoxin-alpha                                     |
| CYT | IL23A     | 446   | 622   | 629 | 565 | 84  | Interleukin-23 subunit alpha                          |
| GF  | BMP5      | 415   | 607   | 580 | 534 | 85  | Bone morphogenetic protein 5                          |
| CHE | IFNL2     | 445   | 467   | 645 | 519 | 90  | Interferon lambda-2                                   |
| INF | IL6       | 430   | 515   | 609 | 518 | 73  | Interleukin-6                                         |
| CHE | CXCL10    | 397   | 387   | 600 | 461 | 98  | C-X-C motif chemokine 10                              |
| GF  | INS       | 468   | 725   | 173 | 455 | 226 | Insulin                                               |
| GF  | GDF15     | 351   | 486   | 350 | 396 | 64  | Growth/differentiation factor 15                      |
| CHE | AXL       | 468   | 122   | 562 | 384 | 189 | Tyrosine-protein kinase receptor UFO                  |
| CHE | BTC       | 337   | 406   | 404 | 383 | 32  | Probetacellulin                                       |
| GF  | NTF4      | 317   | 353   | 383 | 351 | 27  | Neurotrophin-4                                        |
| CYT | IL17B     | 317   | 474   | 127 | 306 | 142 | Interleukin-17B                                       |
| CHE | IL18BP    | 256   | 520   | 125 | 300 | 164 | Interleukin-18-binding protein                        |
| CHE | CXCL12    | 232   | 339   | 310 | 294 | 45  | C-X-C motif chemokine 12                              |
| CYT | SDF1      | 225   | 343   | 312 | 293 | 50  | Stromal cell-derived factor 1                         |
| INF | IL1RN     | 224   | 286   | 329 | 280 | 43  | Interleukin-1 receptor antagonist protein             |
| INF | TNFRSF1B  | 211   | 312   | 313 | 279 | 48  | Tumor necrosis factor receptor superfamily member 1B  |
| GF  | NTF3      | 265   | 152   | 351 | 256 | 81  | Neurotrophin-3                                        |
| INF | IL6R      | 202   | 264   | 220 | 229 | 26  | Interleukin-6 receptor subunit alpha                  |
| GF  | AREG      | 231   | 187   | 250 | 223 | 26  | Amphiregulin                                          |
| GF  | KIT       | 167   | 237   | 239 | 214 | 33  | Mast/stem cell growth factor receptor Kit             |
| GF  | GDNF      | 259   | 85    | 294 | 213 | 91  | Glial cell line-derived neurotrophic factor           |
| REC | CD14      | 175   | 231   | 216 | 207 | 24  | Monocyte differentiation antigen CD14                 |
| INF | CCL5      | 149   | 242   | 213 | 202 | 39  | C-C motif chemokine 5                                 |
| GF  | NGFR      | 272   | 142   | 159 | 191 | 58  | Tumor necrosis factor receptor superfamily member 16  |
| INF | ICAM1     | 146   | 195   | 193 | 178 | 22  | Intercellular adhesion molecule 1                     |
| INF | IL1A      | 171   | 160   | 198 | 177 | 16  | Interleukin-1 alpha                                   |
| GF  | IGF1      | 231   | 116   | 140 | 162 | 50  | Insulin-like growth factor I                          |
| GF  | EGFR      | 113   | 185   | 160 | 153 | 30  | Epidermal growth factor receptor                      |
| INF | CXCL8     | 136   | 109   | 180 | 142 | 29  | Interleukin-8                                         |
| INF | IL16      | 112   | 207   | 76  | 132 | 55  | Pro-interleukin-16                                    |
| GF  | FIGF      | 52    | 151   | 161 | 122 | 49  | Vascular endothelial growth factor D                  |
| CHE | IL31      | 57    | 286   | 14  | 119 | 119 | Interleukin-31                                        |
| INF | CXCL9     | 102   | 109   | 144 | 118 | 18  | C-X-C motif chemokine 9                               |
| CYT | VEGFC     | 110   | 194   | 39  | 114 | 63  | Vascular endothelial growth factor C                  |
| CYT | DKK1      | 97    | 199   | 39  | 112 | 66  | Dickkopf-related protein 1                            |
| GF  | KITLG     | 98    | 121   | 95  | 105 | 12  | Kit ligand                                            |
| GF  | TNFRSF11B | 101   | 86    | 89  | 92  | 7   | Tumor necrosis factor receptor superfamily member 11B |
| CHE | CCL7      | 110   | 57    | 89  | 85  | 22  | C-C motif chemokine 7                                 |
| CHE | CCL8      | 41    | 114   | 98  | 85  | 31  | C-C motif chemokine 8                                 |
| GF  | TGFB3     | 83    | 36    | 117 | 79  | 33  | Transforming growth factor beta-3                     |
| INF | IL15      | 73    | 48    | 94  | 72  | 19  | Interleukin-15                                        |
| INF | IL7       | 85    | 37    | 81  | 67  | 22  | Interleukin-7                                         |
| INF | CCL1      | 5     | 137   | 36  | 59  | 56  | C-C motif chemokine 1                                 |
| GF  | TGFA      | 40    | 25    | 103 | 56  | 34  | Protransforming growth factor alpha                   |

|     |          |    |    |    |    |    |                                                      |
|-----|----------|----|----|----|----|----|------------------------------------------------------|
| REC | FAS      | 39 | 45 | 53 | 46 | 6  | Tumor necrosis factor receptor superfamily member 6  |
| CHE | CCL18    | 37 | 52 | 48 | 46 | 6  | C-C motif chemokine 18                               |
| CHE | CCL20    | 48 | 40 | 48 | 45 | 4  | C-C motif chemokine 20                               |
| GF  | PROK1    | 39 | 40 | 54 | 44 | 7  | Prokineticin-1                                       |
| GF  | PGF      | 36 | 54 | 39 | 43 | 8  | Placenta growth factor                               |
| INF | IL2      | 25 | 27 | 65 | 39 | 19 | Interleukin-2                                        |
| GF  | FLT4     | 25 | 36 | 52 | 37 | 11 | Vascular endothelial growth factor receptor 3        |
| CYT | EPCAM    | 31 | 31 | 43 | 35 | 5  | Epithelial cell adhesion molecule                    |
| INF | CSF2     | 35 | 37 | 24 | 32 | 6  | Granulocyte-macrophage colony-stimulating factor     |
| INF | CSF1     | 34 | 26 | 36 | 32 | 4  | Macrophage colony-stimulating factor 1               |
| CHE | CCL14    | 20 | 24 | 40 | 28 | 9  | C-C motif chemokine 14                               |
| INF | IL4      | 16 | 18 | 36 | 23 | 9  | Interleukin-4                                        |
| INF | IFNG     | 17 | 29 | 22 | 23 | 5  | Interferon gamma                                     |
| CHE | CCL13    | 18 | 22 | 27 | 22 | 4  | C-C motif chemokine 13                               |
| INF | CSF3     | 23 | 25 | 14 | 21 | 5  | Granulocyte colony-stimulating factor                |
| REC | ENG      | 4  | 30 | 23 | 19 | 11 | Endoglin                                             |
| GF  | GH1      | 11 | 31 | 12 | 18 | 9  | Somatotropin                                         |
| CYT | IL2RA    | 14 | 22 | 17 | 18 | 4  | Interleukin-2 receptor subunit alpha                 |
| GF  | PDGFA    | 24 | 4  | 23 | 17 | 9  | Platelet-derived growth factor subunit A             |
| INF | CCL11    | 26 | 9  | 12 | 15 | 8  | Eotaxin                                              |
| CHE | CCL17    | 15 | 19 | 10 | 15 | 4  | C-C motif chemokine 17                               |
| CHE | CXCL5    | 12 | 17 | 8  | 12 | 4  | C-X-C motif chemokine 5                              |
| GF  | BDNF     | 10 | 10 | 14 | 11 | 2  | Brain-derived neurotrophic factor                    |
| CYT | SHH      | 13 | 4  | 13 | 10 | 4  | Sonic hedgehog protein                               |
| CHE | CCL16    | 7  | 6  | 17 | 10 | 5  | C-C motif chemokine 16                               |
| CHE | PPBP     | 9  | 11 | 8  | 9  | 1  | Platelet basic protein                               |
| REC | TNFRSF21 | 11 | 7  | 7  | 8  | 2  | Tumor necrosis factor receptor superfamily member 21 |
| INF | CCL24    | 5  | 17 | 2  | 8  | 6  | C-C motif chemokine 24                               |
| INF | IL1B     | 4  | 9  | 7  | 7  | 2  | Interleukin-1 beta                                   |
| INF | CCL4     | 3  | 5  | 2  | 3  | 1  | C-C motif chemokine 4                                |
| GF  | NGF      | 1  | 5  | 4  | 3  | 2  | Beta-nerve growth factor                             |
| INF | CXCL13   | 3  | 4  | 2  | 3  | 1  | C-X-C motif chemokine 13                             |
| GF  | EGF      | 1  | 1  | 1  | 1  | 0  | Pro-epidermal growth factor                          |
| INF | IL12A    | 1  | 1  | 1  | 1  | 0  | Interleukin-12 subunit alpha                         |

CHE: Chemokine; CYT: Cytokine; GF: Growth factor; INF: Inflammation; REC: Receptor
