# Supplementary material for: Molecular Characterization of Secreted Factors and Extracellular Vesicles-Embedded miRNAs from Bone Marrow-Derived Mesenchymal Stromal Cells in Presence of Synovial Fluid from Osteoarthritis Patients
Source: MDPI journal article supplement (doi:10.3390/biology11111632), 2022-11-08
Supplement: s1 [file s1]

Supplementary Table S5 - First quartile BMSCs EV-miRNAs targets

| miRNA            | hsa-miR-518f-3p | hsa-miR-24-3p | hsa-miR-193b-3p | hsa-miR-222-3p | hsa-miR-574-3p | hsa-miR-191-5p |
|------------------|-----------------|---------------|-----------------|----------------|----------------|----------------|
| Genetic weight % | 17.76           | 13.17         | 8.39            | 7.59           | 5.88           | 5.58           |
| Target           |                 | ABCB9         | AKR1C2          | ABCG2          | CLTC           | BASP1          |
|                  |                 | ACVR1B        | CCND1           | ADAM1A         | CUL2           | CCND2          |
|                  |                 | AGPAT2        | ESR1            | ARID1A         | EGFR           | CDK6           |
|                  |                 | ARHGAP19      | ETS1            | BBC3           | EP300          | CDK9           |
|                  |                 | ATG4A         | KIT             | BMF            | RAC1           | CEBPB          |
|                  |                 | AURKB         | KRAS            | CDKN1B         | RXRA           | CTDSP2         |
|                  |                 | BCAR1         | MAX             | CDKN1C         | SMAD4          | EGR1           |
|                  |                 | BCL2L11       | MCL1            | CERS2          | TGFB1          | IL1A           |
|                  |                 | BRCA1         | MYB             | CORO1A         |                | LRR8A          |
|                  |                 | CARD10        | NF1             | DICER1         |                | MDM4           |
|                  |                 | CCNA2         | PLAU            | DIRAS3         |                | NDST1          |
|                  |                 | CCND1         | PRAP1           | DKK2           |                | NOTCH2         |
|                  |                 | CDK1          | RAD51           | ESR1           |                | RPS6KA3        |
|                  |                 | CDK4          | SHMT2           | ETS1           |                | SATB1          |
|                  |                 | CDKN1B        | SMAD3           | FOS            |                | SLC16A2        |
|                  |                 | CDKN2A        | STMN1           | FOXO1          |                | SOX4           |
|                  |                 | CHEK1         | YWHAZ           | FOXO3          |                | TMC7           |
|                  |                 | COPS5         |                 | GAS5           |                | YBX3           |
|                  |                 | CORO1A        |                 | GJA1           |                |                |
|                  |                 | CYP11B2       |                 | GNAI2          |                |                |
|                  |                 | DEDD          |                 | GNAI3          |                |                |
|                  |                 | DHFR          |                 | GRB10          |                |                |
|                  |                 | DHFRP1        |                 | ICAM1          |                |                |
|                  |                 | DND1          |                 | KIT            |                |                |
|                  |                 | DYRK2         |                 | MGMT           |                |                |
|                  |                 | E2F2          |                 | MMP1           |                |                |
|                  |                 | EIF2S3        |                 | PLXNC1         |                |                |
|                  |                 | FAF1          |                 | PPP2R2A        |                |                |
|                  |                 | FBXW7         |                 | PRDM1          |                |                |
|                  |                 | FEN1          |                 | PTEN           |                |                |
|                  |                 | FGF11         |                 | RECK           |                |                |
|                  |                 | FGFR3         |                 | RUNX2          |                |                |
|                  |                 | FSCN1         |                 | SELE           |                |                |
|                  |                 | FURIN         |                 | SMAD5          |                |                |
|                  |                 | GATA3         |                 | SOD2           |                |                |
|                  |                 | H2AFX         |                 | SSSCA1         |                |                |
|                  |                 | HMOX1         |                 | SSX2IP         |                |                |
|                  |                 | HNF4A         |                 | STAT5A         |                |                |
|                  |                 | IFNG          |                 | TCEAL1         |                |                |
|                  |                 | IFNR          |                 | TIMP3          |                |                |
|                  |                 | IL4           |                 | TMED7          |                |                |
|                  |                 | INSIG1        |                 | TNFSF10        |                |                |
|                  |                 | JPH2          |                 | TP53           |                |                |
|                  |                 | LDHA          |                 | TRPS1          |                |                |
|                  |                 | LDHB          |                 | VGLL4          |                |                |
|                  |                 | MAFB          |                 |                |                |                |
|                  |                 | MAP3K9        |                 |                |                |                |
|                  |                 | MAPK14        |                 |                |                |                |
|                  |                 | MAPK7         |                 |                |                |                |
|                  |                 | MEN1          |                 |                |                |                |
|                  |                 | MLEC          |                 |                |                |                |

MMP14  
MT1M  
MXI1  
MYC  
NCAN  
NCSTN  
NDST1  
NOS3  
NOTCH1  
PAK4  
PCNA  
PDGFRB  
POLD1  
PRDX6  
PRKCH  
PSAP  
PTPN9  
PTPRF  
REG4  
S100A8  
SH3PXD2A  
SLC6A4  
SP1  
SSSCA1  
ST7L  
STX16  
TACC3  
TGFB1  
TMED7  
TMEM92  
TNK2  
TP53  
TRIB3  
TRIM11  
WNT4  
XIAP  
ZNF217



| hsa-miR-484 | hsa-miR-320a-3p | hsa-miR-197-3p | hsa-miR-19b-3p | hsa-miR-214-3p | hsa-miR-99a-5p | hsa-miR-145-5p |
|-------------|-----------------|----------------|----------------|----------------|----------------|----------------|
| 4.14        | 3.47            | 2.18           | 1.35           | 1.32           | 1.25           | 1.25           |
| FIS1        | ABCG2           | BMF            | ARID4B         | ALPK2          | AGO2           | ABCC1          |
| SMAD2       | AQP1            | CD82           | ATXN1          | ARL2           | AKT1           | ABHD17C        |
| ZEB1        | AQP4            | FOXJ2          | BACE1          | ASF1B          | CAPNS1         | ABRACL         |
|             | AR              | FOXO3          | BCL2L11        | ATF4           | CTDSPL         | ACTB           |
|             | ARF1            | MAPK1          | BCL3           | BAX            | FGFR3          | ADAM17         |
|             | ARPP19          | MTHFD1         | BMPR2          | BCL2L11        | FKBP5          | ADD3           |
|             | BANP            | NSUN5          | CUL5           | BCL2L2         | HOXA1          | AKR1B10        |
|             | BM1             | PMAIP1         | CYP19A1        | BIRC5          | IGF1R          | ALDH3A1        |
|             | CDK6            | RAN            | DNMT1          | CADM1          | MTMR3          | ALPPL2         |
|             | CRKL            | TUSC2          | ESR1           | CCL5           | MTOR           | ANGPT2         |
|             | CTNNB1          |                | GCM1           | CD274          | NOX4           | AP1G1          |
|             | ESRRG           |                | HIPK1          | CDK6           | RAVER2         | APH1A          |
|             | FAS             |                | HIPK3          | CPD            | SERPINE1       | ARF6           |
|             | FH              |                | KAT2B          | CTNNB1         | SMARCA5        | ARL6IP5        |
|             | FOXM1           |                | MTUS1          | EZH2           | TRIB2          | BNIP3          |
|             | GNAI1           |                | MXD1           | FGFR1          |                | BRAF           |
|             | HMGB1           |                | MYCN           | GALNT7         |                | C11orf65       |
|             | HOXA10          |                | MYLIP          | GSR            |                | CAMK1D         |
|             | HSPB6           |                | NCOA3          | HDGF           |                | CBFB           |
|             | IGF1R           |                | PITX1          | ING4           |                | CCDC43         |
|             | ITGB3           |                | PKNOX1         | JAG1           |                | CD28           |
|             | KITLG           |                | PPP2R5E        | LTF            |                | CD40           |
|             | MAPK1           |                | PRKAA1         | LZTS1          |                | CD44           |
|             | MCL1            |                | PTEN           | MAP2K3         |                | CDH2           |
|             | MTDH            |                | SMAD4          | MAPK1          |                | CDK4           |
|             | MYC             |                | SOCS1          | MAPK8          |                | CDK6           |
|             | NFATC3          |                | TGFBR2         | MEF2C          |                | CDKN1A         |
|             | NOD2            |                | TLR2           | NRAS           |                | CEP19          |
|             | NPR1            |                | TNFAIP3        | PAPPA          |                | CFTR           |
|             | NRP1            |                | TP53           | PIM1           |                | CLINT1         |
|             | PBX3            |                |                | PLXNB1         |                | COL5A1         |
|             | PDCD4           |                |                | POR            |                | CPEB4          |
|             | PICSAR          |                |                | POU4F2         |                | CRNDE          |
|             | POLR3D          |                |                | PSMD10         |                | CTGF           |
|             | PTEN            |                |                | PTEN           |                | CTNND1         |
|             | RAB11A          |                |                | QKI            |                | DDC            |
|             | RAB14           |                |                | RAB15          |                | DDX17          |
|             | RAC1            |                |                | SEMA4D         |                | DDX6           |
|             | RUNX2           |                |                | SRGAP1         |                | DFFA           |
|             | SUZ12           |                |                | SRGAP2         |                | DTD1           |
|             | TAC1            |                |                | SUFU           |                | E2F3           |
|             | TFRC            |                |                | TP53           |                | EGFR           |
|             | TRPC5           |                |                | TWIST1         |                | EIF4E          |
|             | USP14           |                |                | UBE2I          |                | EPAS1          |
|             | VDAC1           |                |                | XBP1           |                | ERG            |
|             | VEGFA           |                |                |                |                | ESR1           |
|             | VIM             |                |                |                |                | ETS1           |
|             | YWHAZ           |                |                |                |                | F11R           |
|             |                 |                |                |                |                | FAM3C          |
|             |                 |                |                |                |                | FAM45A         |
|             |                 |                |                |                |                | FLI1           |

FSCN1  
FXN  
FZD7  
GMFB  
GOLM1  
HDAC11  
HDAC2  
HLTF  
HMGA2  
HOXA9  
IFNB1  
IGF1R  
ILK  
IRS1  
IRS2  
ITGB8  
JADE1  
JAG1  
KLF4  
KLF5  
KREMEN1  
LYPLA2  
MAP2K6  
MCM2  
MDM2  
MEST  
MIXL1  
MMP1  
MMP12  
MMP14  
MSH3  
MTDH  
MTMR14  
MUC1  
MYC  
MYO5A  
MYO6  
MYOCD  
MYRF  
NAIP  
NANOG  
NDRG2  
NDUFA4  
NEDD9  
NFATC1  
NIPSNAP1  
NRAS  
NUDT1  
PAK4  
PARP8  
PIGF  
PODXL  
POU5F1  
PPM1D  
PPP3CA  
PTP4A2

PXN  
ROBO2  
ROCK1  
RPA1  
RPS6KB1  
RREB1  
RTKN  
SENP1  
SERINC5  
SERPINE1  
SET  
SMAD2  
SMAD3  
SOC57  
SOX2  
SOX9  
SP1  
SP7  
SPTBN1  
SPTLC1  
SRGAP1  
STAT1  
SWAP70  
TGFB2  
TGFB2  
TIRAP  
TMEM9B  
TMOD3  
TNFSF13  
TPM3  
TPRG1  
TSPAN6  
TUG1  
VEGFA  
VPS51  
YES1

| hsa-miR-125b-5p | hsa-miR-627-5p | hsa-miR-342-3p | hsa-miR-409-3p | hsa-miR-21-5p | hsa-miR-106a-5p | hsa-miR-16-5p |
|-----------------|----------------|----------------|----------------|---------------|-----------------|---------------|
| 1.23            | 0.99           | 0.90           | 0.89           | 0.88          | 0.83            | 0.82          |
| ABTB1           | KDM3A          | BIRC6          | AKT1           | ABCB1         | APC             | ACVR2A        |
| AHRR            |                | BMP7           | ANG            | AKT2          | APP             | ADORA2A       |
| AKT1            |                | CTBP2          | CTNND1         | ANKRD46       | ARID4B          | AKT3          |
| ALOX5           |                | DNMT1          | ELF2           | ANP32A        | ATG7            | APP           |
| ANGPT2          |                | E2F1           | FGA            | APAF1         | ATM             | ARHGDI1A      |
| APC             |                | GEMIN4         | FGB            | BASP1         | BCL10           | ARL2          |
| APLN            |                | ID4            | FGG            | BCL10         | BMP2            | AXIN2         |
| ARID3A          |                | IKBKG          | FRAT1          | BCL2          | CASP7           | BACE1         |
| ARID3B          |                | MTDH           | GAB1           | BCL6          | CCND1           | BCL2          |
| BAK1            |                | SREBF1         | IFNG           | BMI1          | CDKN1A          | BDNF          |
| BBC3            |                | SREBF2         | MET            | BMPR2         | CDX2            | BIRC5         |
| BCL2            |                | TAB2           | MGMT           | BTG2          | CXCL8           | BMI1          |
| BCL2L2          |                | TAB3           | NLK            | CADM1         | CYP19A1         | BRCA1         |
| BCL3            |                |                | PHF10          | CASC2         | E2F1            | CADM1         |
| BMF             |                |                | RDX            | CASP8         | ERCC1           | CAPRIN1       |
| BMPR1B          |                |                | RECK           | CBX4          | FAS             | CCND1         |
| BTG2            |                |                | RSU1           | CCL20         | FASTK           | CCND2         |
| CBFB            |                |                | STAG2          | CCR1          | HIF1A           | CCND3         |
| CCNJ            |                |                | UGT2B17        | CDC25A        | HIPK3           | CCNE1         |
| CD44            |                |                | ZEB1           | CDK2AP1       | HMGA2           | CCNT2         |
| CDH5            |                |                |                | CEBPB         | IL10            | CDK6          |
| CDKN2A          |                |                |                | CLU           | LIMK1           | CDS2          |
| CDKN2D          |                |                |                | COL4A1        | MAPK9           | CHEK1         |
| CEBPA           |                |                |                | COX2          | MFN2            | CHUK          |
| CGN             |                |                |                | DAXX          | MGST2           | CLDN2         |
| CSNK2A1         |                |                |                | DDAH1         | MYB             | FGF2          |
| CYP24A1         |                |                |                | DERL1         | MYLIP           | FGFR1         |
| DGAT1           |                |                |                | DNM1L         | PTEN            | GLS2          |
| DKK3            |                |                |                | DOCK4         | RARB            | HDGF          |
| DRAM2           |                |                |                | DOCK5         | RB1             | HGF           |
| DUSP6           |                |                |                | DOCK7         | RBL2            | HMGA1         |
| E2F2            |                |                |                | DUSP10        | RND3            | HMGA2         |
| E2F3            |                |                |                | E2F1          | RUNX1           | IFNG          |
| EGFR            |                |                |                | EGFR          | RUNX3           | IGF1R         |
| EIF4EBP1        |                |                |                | EGLN1         | SIRPA           | IL12B         |
| EIF5A2          |                |                |                | EIF4A2        | SLC2A3          | KDR           |
| ENPEP           |                |                |                | ERBB2         | STAT3           | KRAS          |
| EPO             |                |                |                | FASLG         | TGFBR2          | MAP7          |
| EPOR            |                |                |                | FBXO11        | TIMP2           | METTL13       |
| ERBB2           |                |                |                | FMOD          | ULK1            | MTOR          |
| ERBB3           |                |                |                | FOXO1         | VEGFA           | MYB           |
| ETS1            |                |                |                | FZD6          |                 | NCOR2         |
| Fas             |                |                |                | GAS5          |                 | NCSTN         |
| FES             |                |                |                | GDF5          |                 | OPRM1         |
| FGFR2           |                |                |                | HMGB1         |                 | PIM1          |
| FZD6            |                |                |                | HNRNPK        |                 | PPM1D         |
| GAB2            |                |                |                | HPGD          |                 | PRDM4         |
| GLI1            |                |                |                | ICAM1         |                 | PTGS2         |
| GRIN2A          |                |                |                | ICOSLG        |                 | PURA          |
| GSS             |                |                |                | IGF1R         |                 | RAF1          |
| HK2             |                |                |                | IL12A         |                 | RECK          |

|         |          |         |
|---------|----------|---------|
| HMGA1   | IL1B     | RICTOR  |
| HMGA2   | IRAK1    | RPS6KB1 |
| HOTTIP  | ISCU     | SLC6A4  |
| ICAM2   | JAG1     | SOCS3   |
| IGF1R   | JMY      | SOX5    |
| IGF2    | LRP6     | SOX6    |
| IKZF2   | LRRFIP1  | TP53    |
| IKZF3   | MAP2K3   | TPPP3   |
| IKZF4   | MARCKS   | UCA1    |
| IL6R    | MEF2C    | UNG     |
| IRF4    | MSH2     | VEGFA   |
| JAK2    | MSH6     | WEE1    |
| KLC2    | MSLN     | WNT3A   |
| KLF13   | MTAP     | WNT4    |
| LACTB   | MYD88    | YAP1    |
| LIFR    | NAV3     | ZYX     |
| LIN28A  | NCAPG    |         |
| LIN28B  | NCOA3    |         |
| LIPA    | NFIA     |         |
| MAN1B1  | NFIB     |         |
| MAP3K11 | NTF3     |         |
| MAPK14  | OXTR     |         |
| MCL1    | PCBP1    |         |
| MEGF9   | PCGF2    |         |
| MMP13   | PDCD4    |         |
| MMP2    | PIAS3    |         |
| MMP26   | PIK3R1   |         |
| MUC1    | PLAT     |         |
| MXD1    | PLOD3    |         |
| NCOR2   | PPARA    |         |
| NES     | PPIF     |         |
| NEU1    | PSMD9    |         |
| NKIRAS2 | PTEN     |         |
| NTRK3   | PTPN14   |         |
| PCTP    | PTX3     |         |
| PHF8    | RASA1    |         |
| PIAS3   | RASGRP1  |         |
| PIGF    | RECK     |         |
| PIK3CB  | REST     |         |
| PIK3CD  | RHO      |         |
| PODXL   | RHOB     |         |
| PPP1CA  | RPS7     |         |
| PRDM1   | RTN4     |         |
| PRKRA   | SATB1    |         |
| PTH1R   | SERPINB5 |         |
| RAF1    | SERPINI1 |         |
| RPS6KA1 | SETD2    |         |
| SCNN1A  | SIRT2    |         |
| SEMA4C  | SMAD7    |         |
| SET     | SMARCA4  |         |
| SFRP5   | SMN1     |         |
| SGPL1   | SOCS1    |         |
| SIRT7   | SOCS6    |         |
| SMAD4   | SOD3     |         |
| SMO     | SOX2     |         |
| SPHK1   | SOX5     |         |



STARD13  
STAT3  
SUV39H1  
TBC1D1  
TET2  
TNF  
TNFAIP3  
TP53  
TP53INP1  
VDR  
VPS4B  
VPS51

SP1  
SPRY2  
STAT3  
STUB1  
TAP1  
TCF21  
TGFB2  
TGFB1  
TGFB2  
TGFB3  
TGIF1  
TIAM1  
TICAM2  
TIMP3  
TLR3  
TM9SF3  
TNFAIP3  
TNFRSF10B  
TOPORS  
TP53BP2  
TP63  
TPM1  
TRAF7  
UBE2N  
VEGFA  
VHL  
WWP1  
YOD1

| hsa-miR-17-5p | hsa-let-7b-5p | hsa-miR-29a-3p | hsa-miR-30c-5p | hsa-miR-221-3p | hsa-miR-92a-3p | hsa-miR-30b-5p |
|---------------|---------------|----------------|----------------|----------------|----------------|----------------|
| 0.82          | 0.71          | 0.64           | 0.61           | 0.57           | 0.48           | 0.44           |
| ABCA1         | ACTG1         | ABL1           | BCL9           | ADAM1A         | ARID4B         | ATG12          |
| ADAR          | ACVR1         | ADAM12         | BECN1          | ADAMTS6        | BCL2L11        | BCL2           |
| APP           | AGO1          | ADAMTS9        | CAMK2D         | ANXA1          | BMPR2          | BCL6           |
| BCL2          | AKT2          | AHR            | CASP3          | APAF1          | CCL8           | BCL9           |
| BCL2L11       | ANAPC1        | AKT2           | CCND2          | ARF4           | CD69           | BECN1          |
| BMP2          | CCNA1         | AKT3           | CDC42          | ARIH2          | CDH1           | CAT            |
| BMPR2         | CCNA2         | ALDH5A1        | CTGF           | ARNT           | CPEB2          | CCNE2          |
| BRCA2         | CCND1         | ATG9A          | DDIT4          | ASZ1           | DNMT1          | CTHRC1         |
| CCL1          | CCND2         | BACE1          | DLL4           | BBC3           | DUSP10         | DLL4           |
| CCND1         | CDC25A        | BCL2           | DNMT1          | BCL2L11        | ESR2           | DNMT1          |
| CCND2         | CDC34         | BCL7A          | EIF2S1         | BECN1          | FBXW7          | EIF2S1         |
| CDKN1A        | CDK6          | CACNA1C        | FASN           | BMF            | HDAC2          | EIF5A2         |
| CLOCK         | COL3A1        | CALCR          | FOXO3          | BNIP3          | HIPK1          | ERG            |
| CLU           | CPEB1         | CCND1          | HDAC4          | BNIP3L         | HIPK3          | HOXA1          |
| CYP7B1        | CPEB3         | CCND2          | HSPA4          | BRAP           | IKZF1          | MBNL1          |
| DAPK3         | CPEB4         | CCNT2          | IDH1           | CDKN1B         | ITGA5          | MBNL2          |
| DNAJC27       | CTHRC1        | CD276          | IER2           | CDKN1C         | KAT2B          | MBNL3          |
| DNMT1         | CYP2J2        | CD93           | IL11           | CERS2          | KLF2           | NOTCH1         |
| E2F1          | E2F2          | CDC42          | JAK1           | CORO1A         | KLF4           | PDGFRB         |
| E2F3          | EZH2          | CDC7           | MCL1           | CREBZF         | LASP1          | RASAL2         |
| EGR2          | HMGA1         | CDK2           | MTA1           | CTCF           | MAP2K4         | RUNX2          |
| EPAS1         | HMGA2         | CDK4           | MTTP           | CXCL12         | MAPK8          | SERPINE1       |
| ETV1          | HRAS          | CDK6           | NCOR2          | DDIT4          | MAPRE1         | SIX1           |
| FBXO31        | IFNB1         | CEACAM6        | NOTCH1         | DICER1         | MYCBP2         | SMAD1          |
| GPR137B       | IGF1R         | CLDN1          | PAK1           | DIRAS3         | MYLIP          | SNAI1          |
| HBP1          | IGF2BP1       | COL10A1        | RARB           | DKK2           | NR1H4          | SOCS1          |
| HIF1A         | IGF2BP2       | COL1A2         | RASAL2         | DVL2           | OSBPL2         | TP53           |
| HSPB2         | IRS2          | COL3A1         | RFX6           | ESR1           | OSBPL8         |                |
| ICAM1         | LGR4          | COL4A1         | RUNX2          | ETS1           | PCGF5          |                |
| IGFBP3        | LIN28A        | COL4A2         | SERPINE1       | FMR1           | PHLPP1         |                |
| ITGB8         | LIN28B        | COL5A2         | SMAD1          | FOS            | PTEN           |                |
| JAK1          | LRIG1         | CPEB3          | SNAI1          | FOXO3          | RAD21          |                |
| KAT2B         | MTPN          | CPEB4          | SNAI2          | GJA1           | RFFL           |                |
| LDLR          | NR2E1         | CYP2C19        | SOCS3          | GRB10          | RGS5           |                |
| LIMK1         | NRAS          | DICER1         | TGIF2          | HECTD2         | SIRT1          |                |
| MAP3K12       | PDGFRA        | DKK1           | TP53           | HMGXB4         | SOCS5          |                |
| MAPK9         | PRDM1         | DNMT1          | TWF1           | HOXB5          | STAT3          |                |
| MDM2          | RDH10         | DNMT3A         | UBE2I          | ICAM1          | TGFBR2         |                |
| MEF2D         | RPIA          | DNMT3B         | VIM            | KIT            | TP63           |                |
| MFN2          | TGFBR1        | ELN            |                | MBD2           |                |                |
| MMP2          | TLR4          | FBN1           |                | MDM2           |                |                |
| MYC           | TNFRSF10B     | FGA            |                | MEOX2          |                |                |
| NABP1         |               | FGB            |                | MGMT           |                |                |
| NCOA3         |               | FGG            |                | MMP2           |                |                |
| NPAS3         |               | FOXO3          |                | MYBL1          |                |                |
| NPAT          |               | FSTL1          |                | NAIP           |                |                |
| PDLIM7        |               | GLUL           |                | PAK1           |                |                |
| PHLPP1        |               | GPR85          |                | PIK3R1         |                |                |
| PKD2          |               | GSK3B          |                | PTEN           |                |                |
| PKNOX1        |               | HBP1           |                | RAB1A          |                |                |
| PPP2R2A       |               | HMGCR          |                | RAD51          |                |                |

|          |          |         |
|----------|----------|---------|
| PTEN     | IFNAR1   | RB1     |
| PTPRO    | IGF1     | RECK    |
| RAD21    | IMPDH1   | RUNX1   |
| RB1      | ITGA11   | SELE    |
| RBL1     | ITGA6    | SIRT1   |
| RBL2     | ITGB1    | SOCS1   |
| RND3     | ITIH5    | SOCS3   |
| RUNX1    | KDM5B    | SSX2IP  |
| SELE     | KEAP1    | STAT5A  |
| SIRPA    | KLF4     | STMN1   |
| SMAD4    | KREMEN2  | TBK1    |
| SMURF1   | LAMC2    | TCEAL1  |
| SOCS6    | LOX      | TICAM1  |
| STAT3    | LPL      | TIMP3   |
| TBC1D2   | MCL1     | TMED7   |
| TCEAL1   | MMP2     | TNFSF10 |
| TCF3     | MUC1     | TP53    |
| TGFBFR2  | MYC      | TRPS1   |
| TIMP3    | MYCN     | USP18   |
| TLR7     | NASP     | WEE1    |
| TNF      | NAV3     | ZEB2    |
| TNFSF12  | NFIA     |         |
| TP53COR1 | NMI      |         |
| TP53INP1 | PDGFRB   |         |
| TRIM8    | PER1     |         |
| UBE2C    | PIK3R1   |         |
| VEGFA    | PPM1D    |         |
| VLDLR    | PPP1R13B |         |
| WEE1     | PTEN     |         |
| YES1     | PXDN     |         |
| ZBTB4    | QKI      |         |
| ZFYVE9   | RAN      |         |
| ZNFX1    | RASGRP1  |         |
|          | RNASEL   |         |
|          | ROBO1    |         |
|          | S100B    |         |
|          | SAPCD2   |         |
|          | SERPINB9 |         |
|          | SERPINH1 |         |
|          | SETDB1   |         |
|          | SFRP2    |         |
|          | SLC22A7  |         |
|          | SPARC    |         |
|          | SRGAP2   |         |
|          | TDG      |         |
|          | TET1     |         |
|          | TET2     |         |
|          | TET3     |         |
|          | TFEB     |         |
|          | TNFAIP3  |         |
|          | TRAF4    |         |
|          | TRIM68   |         |
|          | VDAC1    |         |
|          | VEGFA    |         |
|          | ZFP36    |         |



| hsa-miR-20a-5p | hsa-miR-132-3p | hsa-miR-618 | hsa-miR-138-5p | hsa-miR-382-5p | hsa-miR-663b | hsa-miR-483-5 |
|----------------|----------------|-------------|----------------|----------------|--------------|---------------|
| 0.43           | 0.40           | 0.35        | 0.34           | 0.28           | 0.27         | 0.26          |
| ABL2           | AGO2           |             | ADGRA2         | DRD1           | EEF1A2       | ALCAM         |
| ANKH           | ARHGAP32       |             | AKT1           | MXD1           | IGF2         | CKB           |
| APP            | BDNF           |             | ARHGEF3        | NFIA           |              | FAM160B2      |
| ARHGAP12       | CCNA2          |             | BAG1           | PTEN           |              | MAPK3         |
| ATG16L1        | CCNB1          |             | BCL11A         | YBX1           |              | NOTCH3        |
| BAMBI          | CDKN1A         |             | BLCAP          |                |              | RHOA          |
| BCL2           | CRK            |             | CASP3          |                |              | SRF           |
| BCL2L11        | EGFR           |             | CCND1          |                |              |               |
| BMPR2          | FOXO1          |             | CCND3          |                |              |               |
| BNIP2          | GDF5           |             | CD274          |                |              |               |
| CCND1          | HBEGF          |             | CDH1           |                |              |               |
| CCND2          | IRAK4          |             | CYTOR          |                |              |               |
| CDKN1A         | JPT1           |             | EED            |                |              |               |
| CRIM1          | KLHL11         |             | EID1           |                |              |               |
| DAPK3          | MAPK1          |             | EIF4EBP1       |                |              |               |
| DNMT1          | MMP9           |             | EZH2           |                |              |               |
| DUSP2          | MUC13          |             | FERMT2         |                |              |               |
| E2F1           | PIK3R3         |             | FOSL1          |                |              |               |
| E2F3           | RAF1           |             | FOXC1          |                |              |               |
| EGLN3          | RASA1          |             | GNAI2          |                |              |               |
| EGR2           | RB1            |             | H2AFX          |                |              |               |
| EPAS1          | SIRT1          |             | HIF1A          |                |              |               |
| ETV1           | SLC2A1         |             | IGF1R          |                |              |               |
| FBXO31         | SMAD2          |             | KDM5C          |                |              |               |
| GJA1           | SOX4           |             | LCN2           |                |              |               |
| HIF1A          | SOX5           |             | MAP3K11        |                |              |               |
| IRF2           | SOX6           |             | MXD1           |                |              |               |
| ITGB8          | SPRED1         |             | NFKB1          |                |              |               |
| KIF26B         | SPRY1          |             | PTK2           |                |              |               |
| KIT            | TJAP1          |             | RARA           |                |              |               |
| LIMK1          | TLN2           |             | RELN           |                |              |               |
| MAP2K3         | YY1AP1         |             | RHOC           |                |              |               |
| MAP3K12        |                |             | RMND5A         |                |              |               |
| MAP3K5         |                |             | ROCK2          |                |              |               |
| MAPK9          |                |             | S100A1         |                |              |               |
| MCL1           |                |             | SENP1          |                |              |               |
| MEF2D          |                |             | SIRT1          |                |              |               |
| MYC            |                |             | SLC45A3        |                |              |               |
| NFKBIB         |                |             | SNAI2          |                |              |               |
| NRAS           |                |             | SOX4           |                |              |               |
| PHLPP2         |                |             | SOX9           |                |              |               |
| PKD1           |                |             | SUZ12          |                |              |               |
| PKNOX1         |                |             | TERT           |                |              |               |
| PPARG          |                |             | TWIST2         |                |              |               |
| PPP2R2A        |                |             | VIM            |                |              |               |
| PRKG1          |                |             | YAP1           |                |              |               |
| PTEN           |                |             | ZEB2           |                |              |               |
| PTPRO          |                |             |                |                |              |               |
| PURA           |                |             |                |                |              |               |
| RB1            |                |             |                |                |              |               |
| RB1CC1         |                |             |                |                |              |               |

RBL1  
RBL2  
REST  
RGS5  
RUNX1  
RUNX3  
SIRPA  
SMAD4  
SMAD7  
STAT3  
TCEAL1  
TGFB1  
TGFB2  
TIMP2  
TP53INP1  
TSG101  
UBE2C  
VEGFA  
WEE1  
ZFYVE9



| hsa-miR-199a-3p | hsa-miR-520e-3p | hsa-miR-31-5p | hsa-miR-28-3p | hsa-miR-146a-5p | hsa-miR-193a-5p | hsa-miR-34a-5p |
|-----------------|-----------------|---------------|---------------|-----------------|-----------------|----------------|
| 0.23            | 0.21            | 0.21          | 0.19          | 0.19            | 0.18            | 0.17           |
| AKT1            | CD46            | ABCB9         | STAT5B        | BCLAF1          | ERBB2           | ACSL1          |
| APOE            | EGFR            | ARID1A        | TP53          | BRCA1           | IGF2BP1         | ACSL4          |
| CAV2            | MAP3K14         | ARPC5         |               | BRCA2           | ING5            | AGTR1          |
| CD44            | MAP4K4          | BAP1          |               | CARD10          | MTOR            | AIP            |
| CDK7            | PFKP            | C1QTNF9       |               | CASP7           | NLN             | AKT1           |
| DNAJA4          | ZBTB7A          | CASR          |               | CCL5            | PIK3R3          | ANK3           |
| FLT1            |                 | CDK1          |               | CCNA2           | SRR             | AR             |
| FOXA2           |                 | CREG1         |               | CCND1           | TFAP2A          | ARHGDIB        |
| FUT4            |                 | CXCL12        |               | CCND2           | TP73            | ATG4A          |
| HGF             |                 | DACT3         |               | CD40LG          | WT1             | ATG4B          |
| IGF1            |                 | DKK1          |               | CD80            |                 | ATG4C          |
| ITGA3           |                 | DMD           |               | CDKN1A          |                 | ATG4D          |
| KDR             |                 | DOCK1         |               | CDKN3           |                 | ATG5           |
| MAPK1           |                 | E2F2          |               | CFH             |                 | ATG7           |
| MAPK14          |                 | EMSY          |               | CNOT6L          |                 | ATP5S          |
| MAPK8           |                 | ETS1          |               | COPS8           |                 | AXIN2          |
| MAPK9           |                 | FOXO3         |               | COX2            |                 | AXL            |
| MET             |                 | FOXP3         |               | CPM             |                 | BAX            |
| MTOR            |                 | FZD3          |               | CXCL12          |                 | BCL2           |
| PAK4            |                 | GNA13         |               | CXCL8           |                 | BECN1          |
| PTGS2           |                 | HIF1AN        |               | CXCR4           |                 | BIRC5          |
| SMARCA2         |                 | HOXC13        |               | DUSP1           |                 | BMP7           |
| STK11           |                 | ICAM1         |               | EGFR            |                 | CACNB3         |
| TFAM            |                 | IL25          |               | ELAVL1          |                 | CCL22          |
| VEGFA           |                 | ITGA5         |               | ERBB4           |                 | CCND1          |
| YAP1            |                 | JAZF1         |               | FADD            |                 | CCND3          |
| ZHX1            |                 | KLF13         |               | FAF1            |                 | CCNE2          |
|                 |                 | LATS2         |               | FANCM           |                 | CD24           |
|                 |                 | MAP4K4        |               | FAS             |                 | CD44           |
|                 |                 | MCM2          |               | HOXD10          |                 | CDC25A         |
|                 |                 | MET           |               | ICAM1           |                 | CDK4           |
|                 |                 | MLH1          |               | IL6             |                 | CDK6           |
|                 |                 | MMP16         |               | IRAK1           |                 | CDKN2A         |
|                 |                 | MPRIIP        |               | IRAK2           |                 | CDKN2C         |
|                 |                 | NFAT5         |               | IS2             |                 | CEBPB          |
|                 |                 | NUMB          |               | KIF22           |                 | Crtc1          |
|                 |                 | PPP2R2A       |               | L1CAM           |                 | CSF1R          |
|                 |                 | PRKCE         |               | LAMC2           |                 | CYBB           |
|                 |                 | RAB27A        |               | LFNG            |                 | DGUOK          |
|                 |                 | RASA1         |               | LRP2            |                 | DLL1           |
|                 |                 | RDX           |               | MIF             |                 | E2F1           |
|                 |                 | RET           |               | MTA2            |                 | E2F3           |
|                 |                 | RHOA          |               | NFAT5           |                 | EPHA5          |
|                 |                 | RHOBTB1       |               | NFKB1           |                 | ERBB2          |
|                 |                 | SATB2         |               | NOS1            |                 | FKBP1B         |
|                 |                 | SELE          |               | NOTCH1          |                 | FLOT2          |
|                 |                 | SGPP2         |               | NOTCH2          |                 | FOS            |
|                 |                 | SLC1A2        |               | NUMB            |                 | FOSL1          |
|                 |                 | SMAD4         |               | PA2G4           |                 | FOXP1          |
|                 |                 | SOX4          |               | PLAUR           |                 | FUT8           |
|                 |                 | SP7           |               | PRKCE           |                 | GALNT7         |



|        |        |         |
|--------|--------|---------|
| SPRED1 | PTGES2 | GAS1    |
| SPRED2 | PTGS2  | GDF5    |
| SPRY1  | RAC1   | GFRA3   |
| SPRY3  | RARB   | GRM7    |
| SPRY4  | RHO    | HDAC1   |
| SRC    | RHOA   | HMGB1   |
| STK40  | RNF11  | HNF4A   |
| STMN1  | ROCK1  | HNF4G   |
| TBXA2R | SIKE1  | HOTAIR  |
| TIAM1  | SLPI   | IFNB1   |
| WASF3  | SMAD2  | IGF2BP3 |
| XRCC5  | SMAD4  | IL6R    |
| YY1    | SMN1   | IMPA1   |
|        | SOS1   | IMPDH2  |
|        | SOX2   | INHBB   |
|        | STAT1  | JAG1    |
|        | TGFB1  | KCNH1   |
|        | TLR2   | KCNH2   |
|        | TLR4   | KDM4A   |
|        | TRAF6  | KIT     |
|        | UHRF1  | KLB     |
|        | WASF2  | KLF12   |
|        |        | KLF4    |
|        |        | L1CAM   |
|        |        | LDHA    |
|        |        | LEF1    |
|        |        | MAGEA12 |
|        |        | MAGEA2  |
|        |        | MAGEA3  |
|        |        | MAGEA6  |
|        |        | MAP2K1  |
|        |        | MAP3K9  |
|        |        | MDM4    |
|        |        | MET     |
|        |        | MTA2    |
|        |        | MYB     |
|        |        | MYC     |
|        |        | MYCN    |
|        |        | NAMPT   |
|        |        | NANOG   |
|        |        | NLRC5   |
|        |        | NOTCH1  |
|        |        | NOTCH2  |
|        |        | NR4A2   |
|        |        | NUMB    |
|        |        | PAM     |
|        |        | PCBP2   |
|        |        | PDGFRA  |
|        |        | PDGFRB  |
|        |        | PEA15   |
|        |        | PIK3CG  |
|        |        | POU5F1  |
|        |        | PPARA   |
|        |        | PPP1CC  |
|        |        | PPP1R10 |
|        |        | PRKD1   |

RAD51  
RBP2  
RCAN1  
RICTOR  
SIRT1  
SIRT6  
SIRT7  
SMAD4  
SNAI1  
SOX2  
SPI1  
SRC  
STMN1  
STX1A  
SYT1  
TCF7  
TGIF2  
TP53  
TREM2  
ULBP2  
VAMP2  
VEGFA  
WNT1  
YY1  
ZAP70

hsa-miR-376a-3p    hsa-miR-186-5p

0.17

0.15

ACVR1C

ABCB1

AGO2

AKAP12

ATG4C

CSNK2A1

CASP8

FGF2

CDK2

FOXO1

IGF1R

GJA1

KLF15

HIF1A

MEPE

MAP3K2

PIK3R1

NCSTN

SLC16A1

P2RX7

SRSF11

PAK5

TTK

PPM1B

PTTG1

PVT1

RELA

SETD2

TWIST1

VEGFA

XIAP
